1 **Live imaging of the *Cryptosporidium parvum* lifecycle reveals direct development of male**  
2 **and female gametes from type one meronts**

3

4

5

6 Elizabeth D. English<sup>1</sup>, Amandine Guérin<sup>1</sup>, Jayesh Tandel<sup>1</sup>, and Boris Striepen<sup>1\*</sup>

7

8

9 <sup>1</sup> Department of Pathobiology, School of Veterinary Medicine, University of Pennsylvania,  
10 Philadelphia, Pennsylvania, United States of America

11

12

13 \* Corresponding author

14 Email: [striepen@upenn.edu](mailto:striepen@upenn.edu) (BS)

15

16 Short title: The *Cryptosporidium* lifecycle

17

## 18 **Abstract**

19 ***Cryptosporidium* is a leading infectious cause of diarrhea around the world associated**  
20 **with waterborne outbreaks, community spread, or zoonotic transmission. The parasite has**  
21 **significant impact on early childhood mortality, and infection is both consequence and**  
22 **cause of malnutrition and stunting. There is currently no vaccine, and treatment options**  
23 **are very limited. *Cryptosporidium* is a member of the Apicomplexa, and as typical for this**  
24 **protist phylum relies on asexual and sexual reproduction. In contrast to other**  
25 **Apicomplexa, like malaria parasite *Plasmodium*, *Cryptosporidium*'s entire lifecycle unfolds**  
26 **in a single host in less than three days. Here we establish a model to image lifecycle**  
27 **progression in living cells, and observe, track, and compare nuclear division of asexual**  
28 **and sexual stage parasites. We establish the length and sequence of the cell cycles of all**  
29 **stages and map the developmental fate of parasites across multiple rounds of invasion**  
30 **and egress. We determine that the parasite executes an intrinsic program of three**  
31 **generations of asexual replication, followed by a single generation of sexual stages that is**  
32 **independent of environmental stimuli. We find no evidence for a morphologically distinct**  
33 **intermediate stage (the tetraploid type II meront) but demonstrate direct development of**  
34 **gametes from 8N type I meronts. The progeny of each meront is collectively committed to**  
35 **either asexual or sexual fate, but importantly, meronts committed to sexual fate give rise**  
36 **to both males and females. We define a *Cryptosporidium* lifecycle matching Tyzzer's**  
37 **original description and inconsistent with the coccidian lifecycle now shown in many**  
38 **textbooks.**

39

## 40 **Introduction**

41 Pathogen associated diarrheal disease is one of the leading causes of mortality in children  
42 under the age of 5 years [1]. While efforts to improve sanitation, hygiene and access to clean

43 water have reduced the number of diarrheal deaths, nearly half a million children under the age  
44 of 5 died due to diarrheal diseases in 2015. The three most common causes of pathogen  
45 associated diarrhea in children under 5 are rotavirus, *Cryptosporidium*, and *Shigella*, which  
46 together account for more than half of all diarrheal deaths in this age group [1, 2]. Malnourished  
47 children are particularly susceptible to severe cryptosporidiosis [2-4], and in turn, infection with  
48 this pathogen can have long lasting consequences for the nutritional status and overall growth  
49 and development of children [5, 6]. Children develop non-sterile immunity to *Cryptosporidium* that  
50 protects from severe disease and malnutrition [7], however this immunity is slow to develop and  
51 currently no vaccines are available to prevent the infection [3]. Nitazoxanide has been approved  
52 by the US Food and Drug Administration for the treatment of cryptosporidiosis, but this drug is not  
53 effective in immunocompromised or malnourished individuals [8]. The last five years have seen a  
54 significant push towards better treatments for cryptosporidiosis (see [9] for a succinct review).  
55 Several of these efforts took advantage of recent advances in the development of antimalarials  
56 by using cherry picked compound collections initially derived in phenotypic screens against  
57 *Plasmodium falciparum* [10-15]. The value of targeting multiple lifecycle stages is a clear lesson  
58 that emerged from the malaria drug development effort [16]. A more comprehensive  
59 understanding of the biology of the *Cryptosporidium* lifecycle and the relative susceptibility of its  
60 different segments is required to discover and improve drugs to establish effective treatments for  
61 this disease [3].

62

63 *Cryptosporidium* is a single cell protist parasite and a member of the phylum Apicomplexa,  
64 organisms that undergo complex lifecycles of asexual and sexual reproduction. In the well-studied  
65 apicomplexans *Plasmodium* and *Toxoplasma* (the causative agents of malaria and  
66 toxoplasmosis), this lifecycle unfolds in different hosts: mice and cats or humans and mosquitoes,  
67 respectively. In contrast, *Cryptosporidium* replicates both asexually and sexually within a single

68 host and transmission between hosts occurs through meiotic spores called oocysts. In humans  
69 and animals, *Cryptosporidium* infects the intestinal epithelium and oocyst shedding begins on the  
70 third day of infection, in the absence of cell mediated immunity infection is chronic and parasite  
71 growth continues unabated [17-19]. Here we study *Cryptosporidium parvum*, a parasite of cattle  
72 and humans that is experimentally tractable [20]. At any given time, roughly one third of the  
73 parasites within the small intestine of an infected mouse replicate asexually, one third appear to  
74 be sexual stages, and one third represent post-fertilization stages that are in the process of  
75 forming oocysts [21]. In cell culture systems, including the widely used human adeno carcinoma  
76 cell line HCT-8, *Cryptosporidium* is limited to approximately 3 days of growth. Inoculation of HCT-  
77 8 cells with oocysts or sporozoites released from oocysts produces robust infection with parasites  
78 that reproduce asexually, however after two days the culture abruptly sexualizes and is dominated  
79 by male and female gametes and growth ceases. Post-fertilization stages are not observed in  
80 culture, likely due to a block in the fertilization step [21]. Interestingly, in organoid-based cultures  
81 longer-term growth has been observed as has fertilization and oocyst formation [22-24]. Sex thus  
82 appears to reset the lifecycle and initiate subsequent rounds of asexual growth and expansion.

83

84 Different apicomplexans have evolved diverging mechanisms to accommodate the  
85 progression of developmental stages to their respective host niches. Commitment to sexual  
86 development in *Plasmodium* occurs at varying frequencies depending on species and strain,  
87 suggesting an underlying inherited developmental threshold [25]. A small portion of each asexual  
88 generation commits to sexual development and initiates gametocyte development, these cells will  
89 mature into gametes once ingested by mosquitoes with a bloodmeal and then undergo fertilization  
90 [26]. Tissue and biochemical cues have been identified that impact on the likelihood of the  
91 developmental switch that results in exit from the asexual cell cycle and differentiation into the  
92 growth arrested gametocyte stage [27, 28]. In contrast, conversion of *Hammondia* from fast

93 growing tachyzoites to slow growing bradyzoites appears to be governed by a molecular clock  
94 [29, 30]. Similarly, *Eimeria* executes a predetermined number of asexual cycles prior to the  
95 emergence of gametes [31, 32].

96

97 The *Cryptosporidium* lifecycle is remarkably short and much of it unfolds in tissue culture.  
98 Here we establish a long-term live-cell microscopy model to directly observe the lifecycle and to  
99 fate map developmental progression. We find no evidence of environmental induction of  
100 gametogenesis, but strict adherence to a timed developmental program. The intracellular  
101 development of all stages unfolds in roughly twelve-hour intervals, with three generations of  
102 asexual meronts followed by a single generation of gametes. Merozoites emerging from one  
103 parasite cell are collectively committed to either an asexual or sexual fate, but sexually committed  
104 meronts give rise to both males and females. We rigorously demonstrate that gametes develop  
105 directly from asexual stages that produce eight merozoites, known as type I meronts, and we  
106 refute a role for a morphologically distinct type II meront as an intermediate stage between the  
107 asexual and the sexual phase of *Cryptosporidium* development.

108

## 109 **Results**

### 110 **Sexual differentiation of *Cryptosporidium parvum* follows a parasite intrinsic program**

111 *Cryptosporidium parvum* differentiates from the asexual to sexual phase of its lifecycle 48  
112 hours into culture and parasites cease to replicate. We wondered how this transition may be  
113 triggered and considered the presence of a parasite extrinsic stimulus (Fig 1A). This might include  
114 changes in the physicochemical properties of the environment [33], the depletion or accumulation  
115 of a metabolite [27, 34], or the activity of a dedicated density-dependent quorum sensing  
116 mechanism [35]. Alternatively, *C. parvum* may follow an intrinsic program that is independent of  
117 extracellular factors. To test for differentiation stimuli, we performed experiments with conditioned

118 media (Fig 1B). Media were conditioned by growing HCT-8 cells with or without *C. parvum*  
119 infection for 48 hours, the time point when differentiation occurs. The media was filtered (0.45  $\mu$ m)  
120 to remove extracellular parasites, and then transferred to fresh cultures. These cultures were  
121 infected with a *C. parvum* reporter line expressing nanoluciferase and we monitored parasite  
122 growth over 72 hours by luciferase assay [20]. Use of infection conditioned media did not result  
123 in an earlier arrest of parasite growth (Fig 1C).

124

125 We also conducted experiments using a *C. parvum* reporter strain [21] and recorded the  
126 developmental progression through different stages. We again used conditioned media, this time  
127 added to infected coverslip cultures, which were processed for immunofluorescence assays 24,  
128 48, and 72 hours after infection. The number of male gamonts (blue), female gametes (pink) and  
129 asexual meronts (green) was scored at each time point by microscopy (n=3) and is displayed as  
130 a fraction of all parasites encountered (Fig 1D). Conditioning did not hasten lifecycle progression  
131 and the representation of different stages was indistinguishable between conditioned and  
132 unconditioned media, and similar to that previously reported [21].

133

134 We considered that a sex inducing factor might be unstable, poorly soluble, or remain cell  
135 associated, and thus is not transmitted well by media transfer. We used superinfection of the  
136 same culture to test this (Fig 1E). Host cells were first infected with unmarked wildtype *C. parvum*,  
137 24 hours later they were infected again, this second time with a transgenic parasite strain  
138 expressing a fluorescent reporter. We then performed immunofluorescence assays to score  
139 stages and assessed life cycle progression of both infections separately. Despite the presence of  
140 a sexualized primary infection, the second infection again produced gametes only after 48 hours  
141 (Fig 1F), both waves showed similar kinetics but were offset by their 24 hours difference of time

142 in culture. Taken together, we did not find evidence for an external induction mechanism, and  
143 thus propose that *C. parvum* is following an intrinsic program of lifecycle progression.

144

### 145 **Imaging the intracellular development of asexual and sexual stages of *C. parvum***

146 Next, we wanted to observe the *C. parvum* lifecycle program in real time by live-cell  
147 microscopy. We engineered parasites to express a mScarlet fluorescent protein in the cytoplasm  
148 in addition to a mNeon-tagged H2B histone labeling the nuclei in green (S1 Fig). These parasites  
149 were used to infect HCT-8 cells grown in 8-well chamber slides and imaged using an GE  
150 DeltaVision OMX Structured Illumination Microscope controlling temperature and atmosphere  
151 (see Materials and Methods for detail). In preliminary experimentation, we established that  
152 imaging every 30 minutes permitted continuous recording for up to 42 hours while maintaining  
153 parasite and host cell viability. We began imaging at 11 hours of culture which we had previously  
154 established as the end of the first sporozoite initiated merogony cycle [36] and also conducted  
155 experiments imaging from 29 or 40 hours of culture onwards. We used multiple point visiting and  
156 autofocus routines to allow us to observe cells in parallel and in significant numbers collecting a  
157 total of 6171 hours of time lapse data, of which 4542.5 hours were suitable for analysis. We were  
158 able to consistently distinguish the intracellular development of asexual meronts, from that of male  
159 gamonts and female gametes. Asexual parasites were observed prior to 40 hours post infection,  
160 sexual stages after that point.

161

162 Figure 2A shows selected still images from two representative movies of asexual  
163 development (see S1 Movie for multiple additional cells). We analyzed the intracellular  
164 development of a total of 380 meronts and found a mean time to egress of 12.57 hours, which is  
165 similar to the timing of sporozoite initiated *C. parvum* merogony [36]. *C. parvum* replicates by  
166 schizogony [37], resulting in a cell with eight nuclei. We found that the increase in the number of

167 nuclei strictly followed geometric progression, indicating that in contrast to *Plasmodium* [38], in *C.*  
168 *parvum* nuclear divisions are highly coordinated and synchronous throughout. Using nuclear  
169 divisions as landmarks, we discerned three phases: a long initial establishment phase, a relatively  
170 brief mitotic phase, and a final budding phase. Meronts completed the first nuclear division after  
171 7.92 hours, and then ran through two additional complete mitotic cycles, taking about 1 hour for  
172 each (Fig 2C, D and E). There was a lag phase of 2.77 hours between the last division and egress.

173

174 The development of male gamonts followed a pattern similar to that of meronts (Fig 2B and  
175 S2 Movie). After a 6.28-hour establishment phase, four rapid mitotic cycles produced 16 nuclei,  
176 and the average time to egress was 12.08 hours (Fig 2F, G and H). Up to the 8N stage, the nuclei  
177 of male gamonts were round; only the last division produced the highly condensed spindle shaped  
178 nuclei, that are characteristic for male gametes [39, 40]. As seen for meronts the time required  
179 increased slightly from division to division (Fig. 2F). While immature male gamonts appeared  
180 overall similar to meronts, they can be distinguished. The nuclei of gamonts clustered to the  
181 center, while nuclei of meronts showed greater dispersion (see S2 Fig). We note that half of the  
182 male parasites observed failed to egress (93 out of 172 times), this may be typical for male  
183 gamonts, associated with the culture model, or could reflect additive photodamage due to longer  
184 overall imaging times.

185

186 Female parasites did not undergo nuclear division and remained intracellular, allowing us  
187 to image them for 24 hours (the time the experiment ended). However, the size of their nuclei  
188 increased 3-4 times in area, and the overall size of the gamete grew 6-8 times in this time (Fig 2I,  
189 J and S3 Movie). We made two additional observations. First, while female gametes grew rapidly  
190 initially, growth plateaued after 12-15 hours. Female gametes are the transcriptionally and  
191 translationally most active of all lifecycle stages as they produce essentially all components of the



192 oocyst [21, 41] and this was evident in their production of fluorescent protein. We observed a  
193 robust increase in cytosolic mScarlet fluorescence beginning at 8 hours (Fig 2K), this fluorescence  
194 reached peak intensity 12-14 hours after invasion (note that we did not correct for photobleaching  
195 and that fluorescence thus diminishes in the absence of new synthesis). We note that both these  
196 timeframes are match the time to egress for male gametes. Interestingly, all three parasite stages  
197 are morphologically indistinguishable for the first 6-8 hours after invasion, after which male and  
198 asexual parasites begin to divide their nuclei, while female parasites continue to increase in size  
199 (S3 Fig).

200

### 201 **Long term imaging reveals three generations of meronts followed by gametes**

202 Our imaging covered a total of 60 hours of parasite development in multiple overlapping  
203 experiments. We tracked hundreds of individual parasites and mapped them onto the overall  
204 lifecycle timeline. Figure 3A shows each cell as a line, with the start representing invasion, and  
205 the end showing the time of egress (egress is only shown for meronts (green) and male gametes  
206 (blue) as female parasites do not egress). We next mapped all observed nuclear divisions, as well  
207 as invasion and egress events as individual time points (Fig 3 B-E). These analyses revealed  
208 three waves of merogony followed by a single wave of gamete development (please note that we  
209 only observed the tail end of the first wave as we start imaging at 11 hours). Waves begin with a  
210 relatively sharp line followed by a trail of 'late comers'. We note a consistent shift to gametes at  
211 40 hours in line with previous studies using immunofluorescence assays [21, 42, 43].

212

### 213 **Meronts release merozoites committed to either asexual or sexual fate**

214 Next, we searched our image dataset for instances in which we could track successive  
215 generations of parasite development. Figure 4A shows selected frames over 27 hours of a time  
216 lapse movie (Movie S4). The fate of mature cells is indicated by a colored arrowhead, newly

217 invaded next generation stages are highlighted by white arrowheads. We used this information to  
218 derive trees mapping the fate of each parasite cell (Fig 4B shows examples with the interpretation  
219 of the cells shown in Fig 4A in the middle). Note that we cannot unambiguously map the origin or  
220 fate of all parasites. Merozoites left the field of view, cells were lost due to egress and/or cell  
221 death, the simultaneous egress of multiple meronts obscured origin, or phototoxicity stalled the  
222 development of some parasites before we could assign fate. Nonetheless, we were able to track  
223 the fate of the progeny of 49 meronts. During earlier time points, all merozoites emerging from a  
224 meront again gave rise to asexual meronts in the next generation (Fig 4C). As the cultures shifted  
225 from their asexual to their sexual phase at 40 hours, we found all progeny of individual meronts  
226 to give rise to sexual stages. Importantly, when tracking the offspring of individual meronts, we  
227 never observed both asexual and sexual stages developing from the same parental meront. We  
228 conclude that merozoites are collectively committed to lifecycle transition which suggests that  
229 commitment is most likely to occur during the intracellular development of the meront.

230

### 231 **Meronts committed to sexual development give rise to both male and female gametes**

232 While merozoites from a single meront were strictly committed to either asexual or sexual  
233 fate, they were not collectively committed to a single specific sex. We observed both male and  
234 female offspring from the same meront (Fig 4C). Out of 26 individual meronts committed to sexual  
235 fate for which we were able to observe the development of at least 2 offspring, we observed both  
236 male and female offspring 19 times. We were never able to observe all 8 progeny from any  
237 meront, the maximum number of observed offspring was 6, in which 2 developed into males and  
238 4 became female. To determine the male to female ratio of offspring from a single meront, we  
239 conducted a weighted confidence interval based on all 73 observed offspring from the 26 sexually  
240 committed meronts. Based on our observations, the 95% confidence interval suggested that out

241 of the 8 progeny in each meront, between 1.92 and 3.11 will be male. This is consistent with the  
242 fact that we never observed more than 2 male progeny from a single meront.

243

### 244 **Gametes develop directly from type I meronts, type II meronts are not apparent**

245 Currently many lifecycles of *Cryptosporidium* depict a morphologically distinct tetraploid  
246 generation of asexual parasites called the type II meront, as an intermediate between asexual  
247 meronts and gametes (see e.g. the widely reproduced lifecycle from the Centers of Disease  
248 Control and Prevention at <https://www.cdc.gov/parasites/crypto/pathogen.html>). Type II meronts  
249 are shown to give rise to four merozoites in contrast to asexual type I meronts which produce  
250 eight. This model predicts sexual differentiation to be preceded by a wave of tetraploid meronts  
251 (Fig 5A), surprisingly, we did not observe this in a previous study that used molecular markers to  
252 define stages [21]. Our live-cell imaging experiments used a nuclear marker that clearly  
253 distinguished 4 and 8 nuclei stages and thus provided the opportunity to test this rigorously using  
254 a large dataset. We analyzed the eventual fate of 1095 parasites that reached the 4N stage across  
255 the 60 hours observed. Parasites were binned by the time at which four nuclei were observed,  
256 and then categorized into one of three outcomes (Fig 5B): 1) Disappearance after the 4N stage  
257 consistent with egress predicted by type II merogony, 2) progression to 8N prior to egress  
258 (predicted by type I merogony), or 3) progression to 16N prior to egress (male gamogony).  
259 Parasites that remained 4N until the end of the imaging experiment were excluded from analysis.  
260 From 11-40 hours post infection, the vast majority of parasites that reach the 4N stage continued  
261 past that stage to the 8N stage prior to egress. During this time, we did not observe male (16N)  
262 parasites. After 40.5 hours in culture, the proportion of the population that egresses at the 8N  
263 stage decreased markedly over time, while the proportion of the population that develop into  
264 males increased at the same rate. Parasites with apparent egress at the 4N stage were rare and  
265 importantly, their frequency did not change over the culture time and lifecycle.

266           Loss of fluorescence, used here as a proxy for egress, is indistinguishable from host cell  
267 death or lysis due to the egress of another parasite in cells carrying multiple infections. We thus  
268 sought to independently evaluate whether 4N meronts do or do not produce merozoites and  
269 egress using molecular markers. Apicomplexan parasites assemble the organelles required for  
270 invasion at the very end of the cell cycle, and in those parasites replicating by schizogony,  
271 rhoptries and micronemes are only apparent in formed merozoite immediately preceding egress  
272 [37, 44]. Several rhoptry bulb proteins were recently described for *C. parvum*, and their expression  
273 was found to be similarly restricted to parasites harboring merozoites poised to egress [36]. We  
274 evaluated two time points (20 and 34 hours) to observe meronts committed to asexual or sexual  
275 fate in the next generation, respectively and scored the expression of ROP3-HA in 4N and 8N  
276 parasites by immunofluorescence. Labeling was exclusively found in 8N parasites regardless of  
277 the point in the progression of the lifecycle they were observed (Fig 5D and G).

278

279           Key transitions in the intracellular development of apicomplexan parasites are regulated  
280 by the activity of calcium dependent kinases (CDPKs) [45]. CDPK1, an important drug target in  
281 *C. parvum* [46], was recently shown to underly strict cell cycle regulation. The protein was only  
282 detectable in late stages prior to egress and in very young stages following invasion [47]. We  
283 scored the presence of CDPK1-HA in 4N and 8N parasites by immunofluorescence at 20 and 34  
284 hours. CDPK1 staining was only found in 8N stages (Fig 5E), and quantification showed this to  
285 be highly reproducible (Fig 5H). We considered that there might be differences between parasite  
286 development in vitro and in vivo and thus infected mice with CDPK1-HA parasites. Mice were  
287 sacrificed at the peak of infection, small intestines were resected, fixed, frozen and sectioned (see  
288 Material and Methods for detail). Cryo-sections of the tissue were incubated with antibodies to  
289 HA, lactate dehydrogenase (a marker of all parasite stages), and Hoechst to label DNA. We  
290 identified a total of 159 CDPK1 positive cells in 26 fields of view for which we then scored the

291 number of nuclei in the Hoechst channel. All positive cells have a single or eight nuclei and again  
292 we did not detect CDPK1 in 4N parasites (Fig. 5F). Taken together, our culture and animal studies  
293 find no evidence for a tetraploid type II meront stage, and we conclude that development to  
294 gametes occurs directly from meronts that produce eight merozoites. Importantly, we directly  
295 observed this transition (e.g. 4A and B) in our time lapse experiments 26 times.

296

## 297 **Discussion**

298 Apicomplexa undergo a cascade of developmental changes as they transition through their  
299 lifecycles. More than a century of investigation described a complex succession of morphological  
300 types that are specifically adapted to the tasks of invasion and intracellular replication in different  
301 hosts, organs, and tissues. This includes specialized transmission stages that carry the infection  
302 from one host to the next. As these are single celled organisms, differentiation is not terminal or  
303 rigidly inherited, but rather a continuous flow in which each generation elaborates a transient fate.  
304 Edward Tyzzer in his initial description of the *Cryptosporidium muris* lifecycle identified three  
305 intracellular stages: microgamonts that produced 16 microgametes, macrogamonts that produced  
306 single macrogametes, and asexual schizonts. He commented that “the number of merozoites  
307 produced in this process of schizogony is almost invariably eight” [48] he also described  
308 fertilization and oocyst formation resulting in parasite stages containing four sporozoites. The  
309 concept of the tetraploid type II meront as a developmental intermediate between the asexual and  
310 sexual reproduction was introduced by John Vetterling in 1971 [49, 50] in studies on *C. wraii* a  
311 parasite of guinea pigs. This might have been inspired by his extensive work on *Eimeria* in various  
312 animals where distinct meront types occur [51, 52]. At the time *Cryptosporidium* and *Eimeria* were  
313 seen as closely related members of the Coccidia (a phylogenetic view no longer held [53, 54]).  
314 Vetterling’s two meront model has been cited widely since [55] and has become the text book  
315 lifecycle for *Cryptosporidium*. The core of the argument between these authors was how to

316 interpret the tetraploid intracellular parasites found in infected animals and cultures. Are they  
317 mature meronts that will yield four merozoites committed to sexual differentiation, or are these  
318 immature stages that will undergo further nuclear divisions or form oocysts? This was difficult to  
319 resolve using fixed samples, and we therefore chose to study living cells. We documented the  
320 fate of more than a thousand tetraploid parasites by time-lapse microscopy and our observations  
321 are entirely consistent with Tyzzer's original assertion that all meronts produce eight merozoites  
322 – we find no evidence for a type II meront. Molecular markers that report on parasite cell cycle  
323 progression further support this in culture and in infected animals. We note that we have not tested  
324 *C. wrai*, the guineapig parasite Vetterling used in his original work, however, for *C. parvum*, the  
325 most widely studied species of this parasite genus we demonstrate a simple and direct lifecycle  
326 of only three morphologically distinct intracellular stages: meronts that yield eight merozoites,  
327 male gamonts, and female gametes (Fig. 6A).

328

329         The intracellular development of *Cryptosporidium* appears modular. For the initial eight  
330 hours all intracellular stages regardless of their eventual fate are morphologically  
331 indistinguishable. We discern a uniform phase establishing the intracellular reproductive niche  
332 that is associated with initial growth and biomass increase. The parasites inject host modulating  
333 factors that likely play a role in establishing their replicative niche during and following invasion  
334 [36, 56]. Establishment of a protein export system is required for the delivery of the parasite protein  
335 MEDLE2 to the host cytosol. This takes about five hours to become operational and is active in  
336 both asexual and sexual stages. Following the initial establishment phase, the cellular programs  
337 diverge markedly leading to asexual merozoites, or male and female gametes. This process is  
338 highly synchronous yielding a stage specific number of progeny, over a similar roughly 12 hour  
339 time frame (eight merozoites, 16 male gametes, and a single female gamete). This is fast when  
340 compared to other apicomplexans where intracellular cycles unfold over days, and may represent

341 an adaptation to the intestinal epithelium with its high directional turnover with cells being  
342 constantly shed at the tip of each villus.

343

344 A striking feature of *C. parvum* development is the dramatic switch from asexual to sexual  
345 reproduction following three generations of meronts, with gametes discernable at 48 hours [21,  
346 42, 43]. In our experiments we found no evidence for an environmental sex inducing factor, the  
347 parasite adhered to a rigid timetable of differentiation in different scenarios of media transfer or  
348 coinfection. This suggests an intrinsic developmental program that is reset by sex and is  
349 consistent with the link between sex and growth observed by multiple investigators [21-23]. This  
350 contrast with *Plasmodium* where transition to sex is sensitive to environmental and metabolic  
351 indicators and stressors [27, 28] which is critical to achieving balance between colonization and  
352 transmission [57]. To understand how *Cryptosporidium* might be able to forgo such regulation it  
353 is important to consider that, in contrast to *Plasmodium*, for this parasite sex is not solely linked  
354 to transmission but contributes to continued infection. This may shift the colonization/transmission  
355 balance to the oocyst and the likelihood that sporozoites will excyst immediately. The parasite  
356 may be able to integrate environmental cues into this step. Interestingly, some authors reported  
357 thin shelled and thick shell oocyst that may morphologically reflect the dichotomy of local infection  
358 and transmission [40] but experimental confirmation of such a mechanism is still missing.

359

360 It is technically difficult to establish whether the parasite adheres to its rigid pattern or timing  
361 in animals. However, we believe this to be likely, and note that oocyst shedding is detectable on  
362 the third day of infection of mice consistent with the time frame observed in culture [18]. The  
363 mechanism underlying this intrinsic lifecycle transition is unknown, the parasite may measure  
364 time, the number of intracellular cycles, or the accumulation or depletion of a particular molecule  
365 or epigenetic mark. A variety of such mechanisms have been explored in the context of the self-

366 limiting expansion of stem cell populations [58] and this may stimulate future studies. Among  
367 Apicomplexa the transition from asexual to sexual stages has been most intensively studied in  
368 *Plasmodium* [59], where the transcription factor AP2-G was shown to be required for gametocyte  
369 production [60, 61]. AP2-G acts as a master regulator of sex-specific gene expression through a  
370 cascade of transcription factors and additional regulatory genes [61]. AP2-G itself is epigenetically  
371 silenced in a Heterochromatin protein1 (HP1) dependent manner during asexual growth [62] and  
372 HP1 silencing is removed by the protein gametocyte development 1 (GDV1) [63], which is  
373 expressed when *Plasmodium* parasites are grown under conditions that favor sexual stage  
374 development. While there are no obvious homologs of HP1 and GDV1 in *Cryptosporidium*, a  
375 similar epigenetic switch could nonetheless underlie the sexual commitment that we observed  
376 here. Very little is known about epigenetic gene expression regulation in *Cryptosporidium*, beyond  
377 that the *C. parvum* genome encodes some histone modification enzymes [64] and that the  
378 parasites are susceptible to pharmacological inhibition of these pathways [65, 66]. Future studies  
379 analyzing the level of histone modification across the genome and across the lifecycle could  
380 reveal such a mechanism.

381

382         While sex is an ancient phenomenon found in most eukaryotes, how the specific sex or  
383 mating type of individuals is determined is varied and evolutionary malleable [67]. Sex can be  
384 inherited, be determined by environmental factors like temperature, or be ‘negotiated’ between  
385 different members of a population by social behavior, biochemical clues, or cell-cell interaction  
386 and associated signaling events [68-73]. How sex is determined in Apicomplexa is unknown [31,  
387 74] but sexual differentiation and sex-ratio play important roles in transmission and environmental  
388 adaptation [57]. In *Plasmodium* the offspring of individual schizonts is thought to be collectively  
389 committed to a male or female fate in a mutually exclusive fashion [75]. One of the most interesting  
390 observations of our study in *Cryptosporidium*, however, is that the sexually committed meront



391 consistently gives rise to both males and females (Fig. 4). We propose that this makes it likely  
392 that the future sex of individual merozoites and thus the sex ratio is determined in the meront prior  
393 to egress (Fig. 6B). The mechanism by which this is achieved remains to be discovered. The fact  
394 that commitment occurs over the backdrop of cell division may inform the discussion and offers  
395 hypotheses. Unequal inheritance or asymmetrical segregation of fate determining organelles or  
396 molecules is well established in the differentiation of mammalian cells and embryos [76, 77] and  
397 could be at play here. We note an abundance of sex-specific non-coding RNAs in *Cryptosporidium*  
398 [78] as one set of potential candidates. There is also an emerging understanding of mechanisms  
399 that yield differential inheritance of epigenetic histone modification, and this can occur at different  
400 steps of DNA synthesis and mitotic segregation [79]. The mechanism could be stochastic instead  
401 of directive, it may not matter which specific merozoite adopts a certain fate as long as the desired  
402 sex ratio is achieved. Overall, the model predicts merozoite heterogeneity, and experiments that  
403 would reveal the molecular nature of such heterogeneity could provide clues as to how sex is  
404 determined. An important biological consequence of the *Cryptosporidium* commitment model is  
405 that male and female gametes by default will develop in close spatial proximity. Even at very low  
406 initial parasite burden this mechanism provides a safe route towards fertilization through selfing.  
407 This may be critical for a parasite that relies on a sexual lifecycle reset for continued growth [21-  
408 23]. *Cryptosporidium* provides the opportunity to analyze the fundamental molecular tenants of  
409 apicomplexan lifecycle progression, sex determination, and gamete interaction in a stripped-down  
410 single host lifecycle. In this study, we showed it to unfold in culture and over the course of only  
411 four infectious cycles in less than 72 hours, and to employ a minimal cast of three morphological  
412 types.

413

414

## 415 **Materials and Methods**

### 416 **Generation of Transgenic Parasites**

417 Transgenic parasites were generated using previously described methods [20, 80]. Briefly,  
418  $5 \times 10^7$  *C. parvum* oocysts (Iowa II strain obtained from Bunchgrass Farms) were bleached and  
419 washed prior to incubation in 0.8% sodium taurocholate for 1 hour at 37 C to induce excystation.  
420 Following excystation a CRISPR guide plasmid and repair template with 50 base pair homology  
421 arms were introduced via nucleofection using the AMAXA 4D Nucleofector (Lonza). Transfected  
422 sporozoites were then diluted in PBS and used to infect a cage of mice. Here we used the modified  
423 protocol for infection in which mice were given 100  $\mu$ L of 8% sodium bicarbonate solution by oral  
424 gavage 10 minutes prior to oral gavage with the transfected parasites [80]. Stable transformants  
425 were selected with 16 mg/mL paromomycin (in drinking water at libitum) and parasite shedding  
426 was monitored via nanoluciferase activity in the feces of infected mice [20].

427 Transgenic parasites were isolated from feces by sucrose floatation followed by cesium  
428 chloride gradient [81] and then stored at 4 C in PBS until used for each experiment.

429

### 430 **Immunofluorescence Assay**

431 Human adeno carcinoma HCT-8 (ATTC CCL-244) cells were maintained by serial passage  
432 in RPMI-1640 containing 10% fetal bovine serum (FBS). Immediately prior to infection, the  
433 medium was exchanged to RPMI-1640 containing 1% FBS. HCT-8 cells were infected with  
434 oocysts that were bleached using 10% bleach for 10 minutes at 4 C, washed 3 times with cold  
435 PBS, excysted with 0.8% sodium taurocholate at 37 C for 10 minutes, and washed once with PBS  
436 before addition to the culture. Infected HCT-8s were fixed using 4% paraformaldehyde for 10  
437 minutes, then washed and permeabilized with 0.25% triton x-100 for 10 minutes. Fixed and  
438 permeabilized cells were then blocked with 3% bovine serum albumin (BSA) for 1 hour at room  
439 temperature prior to incubation with primary antibodies for 1 hour at room temperature.

440 For immunohistology, ifng<sup>-/-</sup> mice (Jackson Laboratories Strain 002287 bred inhouse) were  
441 infected with 10,000 CDPK1-HA oocysts (a kind gift of Dr. Sumiti Vinayak, University of Illinois  
442 Urbana-Champaign) and their intestines were resected and 'swiss-rolled' prior to fixation  
443 overnight in formalin. Cryo-sectioning was performed by the PennVet Pathology core facility and  
444 immunofluorescence was performed as described [18].

445 Antibodies and dye used: anti-HA (Roche clone 3F10), VVL-FITC (Vector FL1231), anti-  
446 LDH (a kind gift of Dr. Guan Zhu Texas A&M University, now Jilin University [82]).

447 Following incubation with primary antibodies, coverslips were washed three times with PBS  
448 at room temperature, then incubated with appropriate secondary antibodies in 3% BSA for one  
449 hour at room temperature. Cells were counterstained with DAPI or Hoechst for 10 minutes,  
450 washed with PBS twice and then mounted on slides with Fluoromount or Vectashield. Coverslips  
451 were observed using a Leica DM6000B Upright Widefield Microscope using 63x or 100x  
452 objectives or a GE DeltaVision OMX Structured Resolution Microscope using a 60x objective.  
453 Both microscopes are maintained by the Penn Vet Imaging Core.

454

### 455 **Acquisition and Processing of Live-Imaging Data**

456 8-well chamber slides (Ibidi) were seeded with HCT-8 cells, which were then grown in  
457 RPMI-1640 supplemented with 10% FBS at 37 C, 5% CO<sub>2</sub> for 24-48 hours prior to infection. Host  
458 cells were switch to pre-warmed RPMI-1640 supplemented with 1% FBS immediately prior to  
459 infection with bleached, washed and excysted sporozoites. Imaging was preformed beginning at  
460 various time points using a GE DeltaVision OMX Structured Resolution Microscope using the  
461 conventional light path. Growth conditions were maintained throughout each imaging experiment  
462 at 37 C, 5% CO<sub>2</sub> and 40-60% humidity. Using the AcquireSR Acquisition control software, Z-stacks  
463 were taken in both the 488 and 568 channels for multiple points of interest every 30 minutes for  
464 up to 42 hours. Images were processed using the softWoRx image reconstruction and analysis

465 software. Briefly, images were deconvolved, the channels were then aligned, and the z-stacks  
466 were compressed to generate a 2-channel image for each time point. Manual drift correction was  
467 applied in ImageJ to generate movies and stills of individual developing parasites. Ten  
468 independent experiments were performed, we collected a total of 6171 hours of images and were  
469 able to analyze 4542.5 hours containing growth and replication information for 1365 individual  
470 intracellular parasites.

471

### 472 **Analysis of Live-Imaging Data**

473 Analysis was performed using 2-channel time series data obtained as described above.  
474 Parasites were manually tracked and recorded for time of invasion, any subsequent nuclear  
475 replication events, and apparent egress. Data was graphed and analyzed using GraphPad Prism  
476 and Microsoft Excel software.

477

### 478 **Statistical Analysis**

479 The weighted confidence interval was performed in Microsoft Excel using the observational  
480 data from 73 offspring of 26 sexually committed meronts. All other statistical analyses were  
481 performed using GraphPad Prism.

482

### 483 **Acknowledgements**

484 This work was supported in part by grant R01AI127798 from the National Institutes of  
485 Health to BS and a postdoctoral fellowship from EMBO to AG (ALTF 58-2018). We are grateful to  
486 Drs. Vinayak and Zhu for sharing reagents with us and to the PennVet pathology and imaging  
487 core for assistance. We would also like to thank members of our laboratory, particularly Dr.  
488 Katelyn Walzer for ongoing discussions and feedback.

489

490

## 491 **References**

- 492 1. Collaborators GBDDD. Estimates of global, regional, and national morbidity, mortality, and  
493 aetiologies of diarrhoeal diseases: a systematic analysis for the Global Burden of Disease Study 2015.  
494 *Lancet Infect Dis.* 2017;17(9):909-48. Epub 2017/06/06. doi: 10.1016/S1473-3099(17)30276-1. PubMed  
495 PMID: 28579426; PubMed Central PMCID: PMC5589208.
- 496 2. Kotloff KL, Nataro JP, Blackwelder WC, Nasrin D, Farag TH, Panchalingam S, et al. Burden and  
497 aetiology of diarrhoeal disease in infants and young children in developing countries (the Global Enteric  
498 Multicenter Study, GEMS): a prospective, case-control study. *Lancet.* 2013;382(9888):209-22. Epub  
499 2013/05/18. doi: 10.1016/S0140-6736(13)60844-2. PubMed PMID: 23680352.
- 500 3. Checkley W, White AC, Jr., Jaganath D, Arrowood MJ, Chalmers RM, Chen XM, et al. A review of  
501 the global burden, novel diagnostics, therapeutics, and vaccine targets for cryptosporidium. *Lancet Infect*  
502 *Dis.* 2015;15(1):85-94. doi: 10.1016/S1473-3099(14)70772-8. PubMed PMID: 25278220; PubMed Central  
503 PMCID: PMC4401121.
- 504 4. Mondal D, Minak J, Alam M, Liu Y, Dai J, Korpe P, et al. Contribution of Enteric Infection, Altered  
505 Intestinal Barrier Function, and Maternal Malnutrition to Infant Malnutrition in Bangladesh. *Clinical*  
506 *Infectious Diseases.* 2012;54(2):185-92. doi: 10.1093/cid/cir807. PubMed PMID: WOS:000298383700006.
- 507 5. Korpe PS, Petri WA, Jr. Environmental enteropathy: critical implications of a poorly understood  
508 condition. *Trends Mol Med.* 2012;18(6):328-36. doi: 10.1016/j.molmed.2012.04.007. PubMed PMID:  
509 22633998; PubMed Central PMCID: PMC3372657.
- 510 6. Khalil IA, Troeger C, Rao PC, Blacker BF, Brown A, Brewer TG, et al. Morbidity, mortality, and long-  
511 term consequences associated with diarrhoea from *Cryptosporidium* infection in children younger than 5  
512 years: a meta-analysis study. *Lancet Glob Health.* 2018;6(7):e758-e68. Epub 2018/06/16. doi:  
513 10.1016/S2214-109X(18)30283-3. PubMed PMID: 29903377; PubMed Central PMCID: PMC6005120.
- 514 7. Kabir M, Alam M, Nayak U, Arju T, Hossain B, Tarannum R, et al. Nonsterile immunity to  
515 cryptosporidiosis in infants is associated with mucosal IgA against the sporozoite and protection from  
516 malnutrition. *PLoS Pathog.* 2021;17(6):e1009445. Epub 2021/06/29. doi: 10.1371/journal.ppat.1009445.  
517 PubMed PMID: 34181697; PubMed Central PMCID: PMC8270466.
- 518 8. Amadi B, Mwiya M, Sianongo S, Payne L, Watuka A, Katubulushi M, et al. High dose prolonged  
519 treatment with nitazoxanide is not effective for cryptosporidiosis in HIV positive Zambian children: a

- 520 randomised controlled trial. *BMC infectious diseases*. 2009;9:195. doi: 10.1186/1471-2334-9-195.  
521 PubMed PMID: 19954529; PubMed Central PMCID: PMC2794874.
- 522 9. Choy RKM, Huston CD. Cryptosporidiosis should be designated as a tropical disease by the US Food  
523 and Drug Administration. *PLoS neglected tropical diseases*. 2020;14(7):e0008252. Epub 2020/07/03. doi:  
524 10.1371/journal.pntd.0008252. PubMed PMID: 32614819; PubMed Central PMCID: PMCPMC7332027  
525 following competing interests: CDH is inventor on a US patent for the use of MMV665917 and  
526 triazolopyridazine analogs for treatment and prevention of cryptosporidiosis.
- 527 10. Manjunatha UH, Vinayak S, Zambriski JA, Chao AT, Sy T, Noble CG, et al. A *Cryptosporidium* PI(4)K  
528 inhibitor is a drug candidate for cryptosporidiosis. *Nature*. 2017;546(7658):376-80. doi:  
529 10.1038/nature22337. PubMed PMID: 28562588; PubMed Central PMCID: PMCPMC5473467.
- 530 11. Baragana B, Forte B, Choi R, Hewitt SN, Bueren-Calabuig JA, Pisco JP, et al. Lysyl-tRNA synthetase  
531 as a drug target in malaria and cryptosporidiosis. *P Natl Acad Sci USA*. 2019;116(14):7015-20. doi:  
532 10.1073/pnas.1814685116. PubMed PMID: WOS:000463069900080.
- 533 12. Bessoff K, Sateriale A, Lee KK, Huston CD. Drug repurposing screen reveals FDA-approved inhibitors  
534 of human HMG-CoA reductase and isoprenoid synthesis that block *Cryptosporidium parvum* growth.  
535 *Antimicrob Agents Chemother*. 2013;57(4):1804-14. Epub 2013/02/06. doi: 10.1128/AAC.02460-12.  
536 PubMed PMID: 23380723; PubMed Central PMCID: PMC3623326.
- 537 13. Jumani RS, Bessoff K, Love MS, Miller P, Stebbins EE, Teixeira JE, et al. A Novel Piperazine-Based  
538 Drug Lead for Cryptosporidiosis from the Medicines for Malaria Venture Open-Access Malaria Box.  
539 *Antimicrob Agents Chemother*. 2018;62(4). doi: 10.1128/AAC.01505-17. PubMed PMID: 29339392;  
540 PubMed Central PMCID: PMCPMC5913971.
- 541 14. Vinayak S, Jumani RS, Miller P, Hasan MM, McLeod BI, Tandel J, et al. Bicyclic azetidines kill the  
542 diarrheal pathogen *Cryptosporidium* in mice by inhibiting parasite phenylalanyl-tRNA synthetase. *Sci*  
543 *Transl Med*. 2020;12(563). Epub 2020/10/02. doi: 10.1126/scitranslmed.aba8412. PubMed PMID:  
544 32998973; PubMed Central PMCID: PMCPMC8381743.
- 545 15. Love MS, Beasley FC, Jumani RS, Wright TM, Chatterjee AK, Huston CD, et al. A high-throughput  
546 phenotypic screen identifies clofazimine as a potential treatment for cryptosporidiosis. *PLoS neglected*  
547 *tropical diseases*. 2017;11(2):e0005373. doi: 10.1371/journal.pntd.0005373. PubMed PMID: 28158186;  
548 PubMed Central PMCID: PMCPMC5310922.

- 549 16. Flannery EL, Chatterjee AK, Winzeler EA. Antimalarial drug discovery - approaches and progress  
550 towards new medicines. *Nat Rev Microbiol.* 2017;15(9):572. Epub 2017/07/25. doi:  
551 10.1038/nrmicro.2017.88. PubMed PMID: 28736448.
- 552 17. Sateriale A, Slapeta J, Baptista R, Engiles JB, Gullicksrud JA, Herbert GT, et al. A Genetically  
553 Tractable, Natural Mouse Model of Cryptosporidiosis Offers Insights into Host Protective Immunity. *Cell*  
554 *Host Microbe.* 2019;26(1):135-46 e5. Epub 2019/06/25. doi: 10.1016/j.chom.2019.05.006. PubMed PMID:  
555 31231045; PubMed Central PMCID: PMC6617386.
- 556 18. Gullicksrud JA, Sateriale A, Engiles JB, Gibson AR, Shaw S, Hutchins ZA, et al. Enterocyte-innate  
557 lymphoid cell crosstalk drives early IFN-gamma-mediated control of *Cryptosporidium*. *Mucosal Immunol.*  
558 2021. Epub 2021/11/10. doi: 10.1038/s41385-021-00468-6. PubMed PMID: 34750455.
- 559 19. Griffiths JK, Theodos C, Paris M, Tzipori S. The gamma interferon gene knockout mouse: a highly  
560 sensitive model for evaluation of therapeutic agents against *Cryptosporidium parvum*. *J Clin Microbiol.*  
561 1998;36(9):2503-8. PubMed PMID: 9705383.
- 562 20. Vinayak S, Pawlowic MC, Sateriale A, Brooks CF, Studstill CJ, Bar-Peled Y, et al. Genetic modification  
563 of the diarrhoeal pathogen *Cryptosporidium parvum*. *Nature.* 2015;523(7561):477-80. Epub 2015/07/16.  
564 doi: 10.1038/nature14651. PubMed PMID: 26176919; PubMed Central PMCID: PMC64640681.
- 565 21. Tandel J, English ED, Sateriale A, Gullicksrud JA, Beiting DP, Sullivan MC, et al. Life cycle progression  
566 and sexual development of the apicomplexan parasite *Cryptosporidium parvum*. *Nat Microbiol.*  
567 2019;4(12):2226-36. Epub 2019/09/04. doi: 10.1038/s41564-019-0539-x. PubMed PMID: 31477896;  
568 PubMed Central PMCID: PMC6877471.
- 569 22. Heo I, Dutta D, Schaefer DA, Jakobachvili N, Artegiani B, Sachs N, et al. Modelling *Cryptosporidium*  
570 infection in human small intestinal and lung organoids. *Nat Microbiol.* 2018;3(7):814-+. doi:  
571 10.1038/s41564-018-0177-8. PubMed PMID: WOS:000436530900010.
- 572 23. Wilke G, Funkhouser-Jones LJ, Wang Y, Ravindran S, Wang Q, Beatty WL, et al. A Stem-Cell-Derived  
573 Platform Enables Complete *Cryptosporidium* Development In Vitro and Genetic Tractability. *Cell Host*  
574 *Microbe.* 2019;26(1):123-34 e8. doi: 10.1016/j.chom.2019.05.007. PubMed PMID: 31231046; PubMed  
575 Central PMCID: PMC6617391.
- 576 24. Nikolaev M, Mitrofanova O, Broguiere N, Geraldo S, Dutta D, Tabata Y, et al. Homeostatic mini-  
577 intestines through scaffold-guided organoid morphogenesis. *Nature.* 2020;585(7826):574-+. doi:  
578 10.1038/s41586-020-2724-8. PubMed PMID: WOS:000570130400002.

- 579 25. Smalley ME, Brown J, Bassett NM. The rate of production of *Plasmodium falciparum* gametocytes  
580 during natural infections. *Transactions of the Royal Society of Tropical Medicine and Hygiene*.  
581 1981;75(2):318-9. Epub 1981/01/01. doi: 10.1016/0035-9203(81)90349-7. PubMed PMID: 7029806.
- 582 26. Kuehn A, Pradel G. The coming-out of malaria gametocytes. *J Biomed Biotechnol*.  
583 2010;2010:976827. Epub 2010/01/30. doi: 10.1155/2010/976827. PubMed PMID: 20111746; PubMed  
584 Central PMCID: PMCPMC2810480.
- 585 27. Brancucci NMB, Gerdt JP, Wang C, De Niz M, Philip N, Adapa SR, et al. Lysophosphatidylcholine  
586 Regulates Sexual Stage Differentiation in the Human Malaria Parasite *Plasmodium falciparum*. *Cell*.  
587 2017;171(7):1532-44 e15. Epub 2017/11/14. doi: 10.1016/j.cell.2017.10.020. PubMed PMID: 29129376;  
588 PubMed Central PMCID: PMCPMC5733390.
- 589 28. Venugopal K, Hentzschel F, Valkiunas G, Marti M. *Plasmodium* asexual growth and sexual  
590 development in the haematopoietic niche of the host. *Nat Rev Microbiol*. 2020;18(3):177-89. Epub  
591 2020/01/11. doi: 10.1038/s41579-019-0306-2. PubMed PMID: 31919479; PubMed Central PMCID:  
592 PMCPMC7223625.
- 593 29. Sokol-Borrelli SL, Coombs RS, Boyle JP. A Comparison of Stage Conversion in the Coccidian  
594 Apicomplexans *Toxoplasma gondii*, *Hammondia hammondi*, and *Neospora caninum*. *Front Cell Infect*  
595 *Microbiol*. 2020;10:608283. Epub 2020/12/22. doi: 10.3389/fcimb.2020.608283. PubMed PMID:  
596 33344268; PubMed Central PMCID: PMCPMC7744739.
- 597 30. Sokol SL, Primack AS, Nair SC, Wong ZS, Tembo M, Verma SK, et al. Dissection of the in vitro  
598 developmental program of *Hammondia hammondi* reveals a link between stress sensitivity and life cycle  
599 flexibility in *Toxoplasma gondii*. *Elife*. 2018;7. Epub 2018/05/23. doi: 10.7554/eLife.36491. PubMed PMID:  
600 29785929; PubMed Central PMCID: PMCPMC5963921.
- 601 31. Walker RA, Ferguson DJ, Miller CM, Smith NC. Sex and *Eimeria*: a molecular perspective.  
602 *Parasitology*. 2013;140(14):1701-17. doi: 10.1017/S0031182013000838. PubMed PMID: 23953058.
- 603 32. McDonald V, Rose ME. *Eimeria tenella* and *E. necatrix*: a third generation of schizogony is an  
604 obligatory part of the developmental cycle. *J Parasitol*. 1987;73(3):617-22. Epub 1987/06/01. PubMed  
605 PMID: 3598808.
- 606 33. Soete M, Camus D, Dubremetz JF. Experimental induction of bradyzoite-specific antigen expression  
607 and cyst formation by the RH strain of *Toxoplasma gondii* in vitro. *Exp Parasitol*. 1994;78(4):361-70.



- 608 34. Fox BA, Gigley JP, Bzik DJ. *Toxoplasma gondii* lacks the enzymes required for de novo arginine  
609 biosynthesis and arginine starvation triggers cyst formation. *Int J Parasitol.* 2004;34(3):323-31. Epub  
610 2004/03/09. doi: 10.1016/j.ijpara.2003.12.001. PubMed PMID: 15003493.
- 611 35. Rojas F, Silvester E, Young J, Milne R, Tettey M, Houston DR, et al. Oligopeptide Signaling through  
612 TbGPR89 Drives Trypanosome Quorum Sensing. *Cell.* 2019;176(1-2):306-17 e16. Epub 2018/12/07. doi:  
613 10.1016/j.cell.2018.10.041. PubMed PMID: 30503212; PubMed Central PMCID: PMC6333907.
- 614 36. Guerin A, Roy NH, Kugler EM, Berry L, Burkhardt JK, Shin JB, et al. *Cryptosporidium* rhoptry effector  
615 protein ROP1 injected during invasion targets the host cytoskeletal modulator LMO7. *Cell Host Microbe.*  
616 2021;29(9):1407-20 e5. Epub 2021/08/05. doi: 10.1016/j.chom.2021.07.002. PubMed PMID: 34348092;  
617 PubMed Central PMCID: PMC68475647.
- 618 37. Francia ME, Striepen B. Cell division in apicomplexan parasites. *Nat Rev Microbiol.* 2014;12(2):125-  
619 36. doi: 10.1038/nrmicro3184. PubMed PMID: 24384598.
- 620 38. Arnot DE, Ronander E, Bengtsson DC. The progression of the intra-erythrocytic cell cycle of  
621 *Plasmodium falciparum* and the role of the centriolar plaques in asynchronous mitotic division during  
622 schizogony. *Int J Parasitol.* 2011;41(1):71-80. Epub 2010/09/08. doi: 10.1016/j.ijpara.2010.07.012.  
623 PubMed PMID: 20816844.
- 624 39. Ostrovska K, Paperna I. *Cryptosporidium* sp. of the starred lizard *Agame stellio*: ultrastructure and  
625 life cycle. *Parasitology Research.* 1990;76:712-20.
- 626 40. Cheadle MA, Toivio-Kinnucan M, Blagburn BL. The ultrastructure of gametogenesis of  
627 *cryptosporidium baileyi* (eimeriorina; cryptosporidiidae) in the respiratory tract of broiler chickens (*Gallus*  
628 *domesticus*). *J Parasitol.* 1999;85(4):609-15. Epub 1999/08/26. PubMed PMID: 10461939.
- 629 41. Templeton TJ, Lancto CA, Vigdorovich V, Liu C, London NR, Hadsall KZ, et al. The *Cryptosporidium*  
630 oocyst wall protein is a member of a multigene family and has a homolog in *Toxoplasma*. *Infection and*  
631 *Immunity.* 2004;72(2):980-7. doi: 10.1128/iai.72.2.980-987.2004. PubMed PMID:  
632 WOS:000188766400044.
- 633 42. Jumani RS, Hasan MM, Stebbins EE, Donnelly L, Miller P, Klopfer C, et al. A suite of phenotypic  
634 assays to ensure pipeline diversity when prioritizing drug-like *Cryptosporidium* growth inhibitors. *Nature*  
635 *communications.* 2019;10(1):1862. doi: 10.1038/s41467-019-09880-w. PubMed PMID: 31015448;  
636 PubMed Central PMCID: PMC6478823.
- 637 43. Wilke G, Ravindran S, Funkhouser-Jones L, Barks J, Wang Q, VanDussen KL, et al. Monoclonal  
638 Antibodies to Intracellular Stages of *Cryptosporidium parvum* Define Life Cycle Progression In Vitro.

- 639 mSphere. 2018;3(3). doi: 10.1128/mSphere.00124-18. PubMed PMID: 29848759; PubMed Central PMCID:  
640 PMCPMC5976880.
- 641 44. Counihan NA, Kalanon M, Coppel RL, de Koning-Ward TF. Plasmodium rhoptry proteins: why order  
642 is important. Trends Parasitol. 2013;29(5):228-36. Epub 2013/04/11. doi: 10.1016/j.pt.2013.03.003.  
643 PubMed PMID: 23570755.
- 644 45. Lourido S, Moreno SN. The calcium signaling toolkit of the Apicomplexan parasites *Toxoplasma*  
645 *gondii* and *Plasmodium* spp. Cell Calcium. 2015;57(3):186-93. Epub 2015/01/22. doi:  
646 10.1016/j.ceca.2014.12.010. PubMed PMID: 25605521; PubMed Central PMCID: PMCPMC4428288.
- 647 46. Hulverson MA, Vinayak S, Choi R, Schaefer DA, Castellanos-Gonzalez A, Vidadala RSR, et al.  
648 Bumped-Kinase Inhibitors for Cryptosporidiosis Therapy. J Infect Dis. 2017;215(8):1275-84. Epub  
649 2017/03/23. doi: 10.1093/infdis/jix120. PubMed PMID: 28329187; PubMed Central PMCID:  
650 PMCPMC5853794.
- 651 47. Choudhary HH, Nava MG, Gartlan BE, Rose S, Vinayak S. A Conditional Protein Degradation System  
652 To Study Essential Gene Function in *Cryptosporidium parvum*. mBio. 2020;11(4). Epub 2020/08/28. doi:  
653 10.1128/mBio.01231-20. PubMed PMID: 32843543; PubMed Central PMCID: PMCPMC7448269.
- 654 48. Tyzzer EE. An extracellular Coccidium, *Cryptosporidium Muris* (Gen. Et Sp. Nov.), of the gastric  
655 Glands of the Common Mouse. J Med Res. 1910;23(3):487-510 3. PubMed PMID: 19971982; PubMed  
656 Central PMCID: PMCPMC2098948.
- 657 49. Vetterling JM, Jervis HR, Merrill TG, Sprinz H. *Cryptosporidium wrairi* sp. n. from the guinea pig  
658 *Cavia porcellus*, with an emendation of the genus. J Protozool. 1971;18(2):243-7. Epub 1971/05/01. doi:  
659 10.1111/j.1550-7408.1971.tb03315.x. PubMed PMID: 4997038.
- 660 50. Vetterling JM, Takeuchi A, Madden PA. Ultrastructure of *Cryptosporidium wrairi* from the guinea  
661 pig. J Protozool. 1971;18(2):248-60. Epub 1971/05/01. doi: 10.1111/j.1550-7408.1971.tb03316.x.  
662 PubMed PMID: 4997039.
- 663 51. Dubremetz JF. [Genesis of merozoites in the coccidia, *Eimeria necatrix*. Ultrastructural study]. J  
664 Protozool. 1975;22(1):71-84. PubMed PMID: 1117438.
- 665 52. Muller BE. Ultrastructural development of first- to second-generation merozoites in *Eimeria*  
666 *contorta* Haberkorn, 1971. Z Parasitenkd. 1975;47(2):91-101.
- 667 53. Carreno RA, Martin DS, Barta JR. *Cryptosporidium* is more closely related to the gregarines than to  
668 coccidia as shown by phylogenetic analysis of apicomplexan parasites inferred using small-subunit  
669 ribosomal RNA gene sequences. Parasitol Res. 1999;85(11):899-904. PubMed PMID: 10540950.

- 670 54. Leander BS, Clopton RE, Keeling PJ. Phylogeny of gregarines (Apicomplexa) as inferred from small-  
671 subunit rDNA and beta-tubulin. *Int J Syst Evol Microbiol.* 2003;53(Pt 1):345-54. PubMed PMID: 12656194.
- 672 55. Current WL, Reese NC. A comparison of endogenous development of three isolates of  
673 *Cryptosporidium* in suckling mice. *J Protozool.* 1986;33(1):98-108. PubMed PMID: 3959014.
- 674 56. Dumaine JE, Sateriale A, Gibson AR, Reddy AG, Gullicksrud JA, Hunter E, et al. The enteric pathogen  
675 *Cryptosporidium parvum* exports proteins into the cytosol of the infected cell. *Elife.* 2021:in press.
- 676 57. Schneider P, Reece SE. The private life of malaria parasites: Strategies for sexual reproduction. *Mol*  
677 *Biochem Parasitol.* 2021;244:111375. Epub 2021/05/24. doi: 10.1016/j.molbiopara.2021.111375.  
678 PubMed PMID: 34023299; PubMed Central PMCID: PMCPMC8346949.
- 679 58. Bernitz JM, Kim HS, MacArthur B, Sieburg H, Moore K. Hematopoietic Stem Cells Count and  
680 Remember Self-Renewal Divisions. *Cell.* 2016;167(5):1296-309 e10. Epub 2016/11/15. doi:  
681 10.1016/j.cell.2016.10.022. PubMed PMID: 27839867; PubMed Central PMCID: PMCPMC5115957.
- 682 59. Josling GA, Williamson KC, Llinas M. Regulation of Sexual Commitment and Gametocytogenesis in  
683 Malaria Parasites. *Annu Rev Microbiol.* 2018;72:501-19. Epub 2018/07/06. doi: 10.1146/annurev-micro-  
684 090817-062712. PubMed PMID: 29975590; PubMed Central PMCID: PMCPMC7164540.
- 685 60. Kafsack BF, Rovira-Graells N, Clark TG, Bancells C, Crowley VM, Campino SG, et al. A transcriptional  
686 switch underlies commitment to sexual development in malaria parasites. *Nature.* 2014;507(7491):248-  
687 52. doi: 10.1038/nature12920. PubMed PMID: 24572369; PubMed Central PMCID: PMCPMC4040541.
- 688 61. Sinha A, Hughes KR, Modrzynska KK, Otto TD, Pfander C, Dickens NJ, et al. A cascade of DNA-  
689 binding proteins for sexual commitment and development in *Plasmodium*. *Nature.* 2014;507(7491):253-  
690 7. doi: 10.1038/nature12970. PubMed PMID: 24572359; PubMed Central PMCID: PMCPMC4105895.
- 691 62. Brancucci NMB, Bertschi NL, Zhu L, Niederwieser I, Chin WH, Wampfler R, et al. Heterochromatin  
692 protein 1 secures survival and transmission of malaria parasites. *Cell Host Microbe.* 2014;16(2):165-76.  
693 Epub 2014/08/15. doi: 10.1016/j.chom.2014.07.004. PubMed PMID: 25121746.
- 694 63. Filarsky M, Fraschka SA, Niederwieser I, Brancucci NMB, Carrington E, Carrio E, et al. GDV1 induces  
695 sexual commitment of malaria parasites by antagonizing HP1-dependent gene silencing. *Science.*  
696 2018;359(6381):1259-63. Epub 2018/03/29. doi: 10.1126/science.aan6042. PubMed PMID: 29590075;  
697 PubMed Central PMCID: PMCPMC6219702.
- 698 64. Rider SD, Jr., Zhu G. An apicomplexan ankyrin-repeat histone deacetylase with relatives in  
699 photosynthetic eukaryotes. *Int J Parasitol.* 2009;39(7):747-54. Epub 2009/01/13. doi:  
700 10.1016/j.ijpara.2008.11.012. PubMed PMID: 19136004; PubMed Central PMCID: PMCPMC4616004.

- 701 65. Guo F, Zhang H, McNair NN, Mead JR, Zhu G. The Existing Drug Vorinostat as a New Lead Against  
702 Cryptosporidiosis by Targeting the Parasite Histone Deacetylases. *J Infect Dis.* 2018;217(7):1110-7. Epub  
703 2018/01/05. doi: 10.1093/infdis/jix689. PubMed PMID: 29300993; PubMed Central PMCID:  
704 PMCPMC5939870.
- 705 66. Murakoshi F, Bando H, Sugi T, Adeyemi OS, Nonaka M, Nakaya T, et al. Nullscript inhibits  
706 Cryptosporidium and Toxoplasma growth. *International journal for parasitology Drugs and drug*  
707 *resistance.* 2020;14:159-66. Epub 2020/10/30. doi: 10.1016/j.ijpddr.2020.10.004. PubMed PMID:  
708 33120250; PubMed Central PMCID: PMCPMC7593347.
- 709 67. Bachtrog D, Mank JE, Peichel CL, Kirkpatrick M, Otto SP, Ashman TL, et al. Sex Determination: Why  
710 So Many Ways of Doing It? *Plos Biology.* 2014;12(7). doi: ARTN e1001899  
711 10.1371/journal.pbio.1001899. PubMed PMID: WOS:000340550400003.
- 712 68. Buston P. Social hierarchies: size and growth modification in clownfish. *Nature.*  
713 2003;424(6945):145-6. Epub 2003/07/11. doi: 10.1038/424145a. PubMed PMID: 12853944.
- 714 69. Orias E, Singh DP, Meyer E. Genetics and Epigenetics of Mating Type Determination in Paramecium  
715 and Tetrahymena. *Annual Review of Microbiology, Vol 71.* 2017;71:133-56. doi: 10.1146/annurev-micro-  
716 090816-093342. PubMed PMID: WOS:000411800600009.
- 717 70. Frenkel J, Vyverman W, Pohnert G. Pheromone signaling during sexual reproduction in algae. *Plant*  
718 *J.* 2014;79(4):632-44. doi: 10.1111/tpj.12496. PubMed PMID: 24597605.
- 719 71. Mori T, Kawai-Toyooka H, Igawa T, Nozaki H. Gamete Dialogs in Green Lineages. *Mol Plant.*  
720 2015;8(10):1442-54. doi: 10.1016/j.molp.2015.06.008. PubMed PMID: 26145252.
- 721 72. Hansson A, Olsson M. Incubation temperature and parental identity determine sex in the  
722 Australian agamid lizard *Ctenophorus pictus*. *Ecol Evol.* 2018;8(19):9827-33. doi: 10.1002/ece3.4466.  
723 PubMed PMID: 30386578; PubMed Central PMCID: PMCPMC6202699.
- 724 73. Whiteley SL, Weisbecker V, Georges A, Gauthier ARG, Whitehead DL, Holleley CE. Developmental  
725 asynchrony and antagonism of sex determination pathways in a lizard with temperature-induced sex  
726 reversal. *Scientific reports.* 2018;8(1):14892. doi: 10.1038/s41598-018-33170-y. PubMed PMID:  
727 30291276; PubMed Central PMCID: PMCPMC6173690.
- 728 74. Smith TG, Walliker D, Ranford-Cartwright LC. Sexual differentiation and sex determination in the  
729 Apicomplexa. *Trends Parasitol.* 2002;18(7):315-23. PubMed PMID: 12379952.

- 730 75. Silvestrini F, Alano P, Williams JL. Commitment to the production of male and female gametocytes  
731 in the human malaria parasite *Plasmodium falciparum*. *Parasitology*. 2000;121 Pt 5:465-71. Epub  
732 2000/12/29. doi: 10.1017/s0031182099006691. PubMed PMID: 11128797.
- 733 76. Chang JT, Palanivel VR, Kinjyo I, Schambach F, Intlekofer AM, Banerjee A, et al. Asymmetric T  
734 lymphocyte division in the initiation of adaptive immune responses. *Science*. 2007;315(5819):1687-91.  
735 Epub 2007/03/03. doi: 10.1126/science.1139393. PubMed PMID: 17332376.
- 736 77. Salle J, Minc N. Cell division geometries as central organizers of early embryo development. *Semin*  
737 *Cell Dev Biol*. 2021;in press. Available at <https://doi.org/10.1016/j.semcdb.2021.08.004>. doi:  
738 <https://doi.org/10.1016/j.semcdb.2021.08.004>.
- 739 78. Li Y, Baptista RP, Sateriale A, Striepen B, Kissinger JC. Analysis of Long Non-Coding RNA in  
740 *Cryptosporidium parvum* Reveals Significant Stage-Specific Antisense Transcription. *Front Cell Infect Mi*.  
741 2021;10(833). doi: 10.3389/fcimb.2020.608298.
- 742 79. Xie J, Wooten M, Tran V, Chen X. Breaking Symmetry - Asymmetric Histone Inheritance in Stem  
743 Cells. *Trends Cell Biol*. 2017;27(7):527-40. Epub 2017/03/08. doi: 10.1016/j.tcb.2017.02.001. PubMed  
744 PMID: 28268050; PubMed Central PMCID: PMC5476491.
- 745 80. Sateriale A, Pawlowic M, Vinayak S, Brooks C, Striepen B. Genetic Manipulation of *Cryptosporidium*  
746 *parvum* with CRISPR/Cas9. *Methods Mol Biol*. 2020;2052:219-28. Epub 2019/08/28. doi: 10.1007/978-1-  
747 4939-9748-0\_13. PubMed PMID: 31452165.
- 748 81. Pawlowic MC, Vinayak S, Sateriale A, Brooks CF, Striepen B. Generating and Maintaining Transgenic  
749 *Cryptosporidium parvum* Parasites. *Curr Protoc Microbiol*. 2017;46:20B 2 1-B 2 32. doi: 10.1002/cpmc.33.  
750 PubMed PMID: 28800157; PubMed Central PMCID: PMC5556942.
- 751 82. Zhang H, Guo F, Zhu G. *Cryptosporidium* Lactate Dehydrogenase Is Associated with the  
752 Parasitophorous Vacuole Membrane and Is a Potential Target for Developing Therapeutics. *PLoS Pathog*.  
753 2015;11(11):e1005250. Epub 2015/11/13. doi: 10.1371/journal.ppat.1005250. PubMed PMID: 26562790;  
754 PubMed Central PMCID: PMC4642935.

755

756

**A**

Extrinsic or intrinsic lifecycle progression?

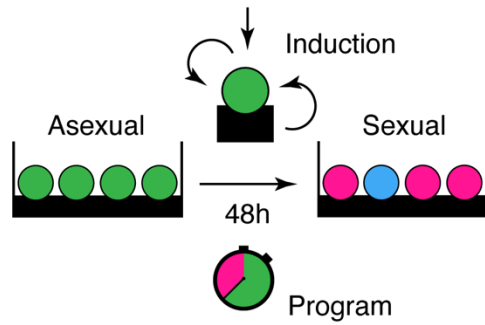

**B**

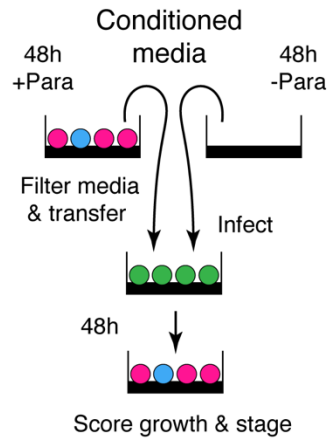

**C**

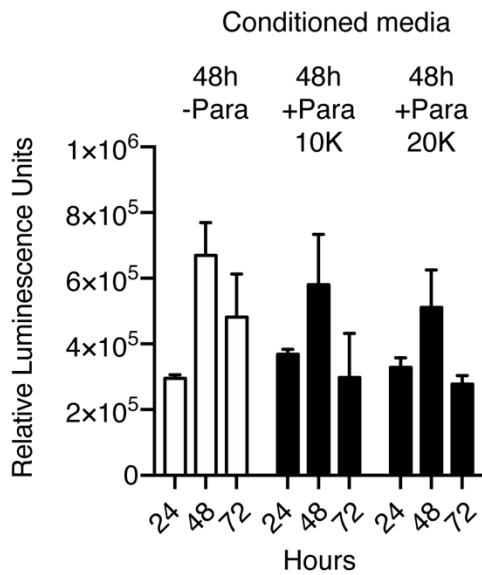

**D**

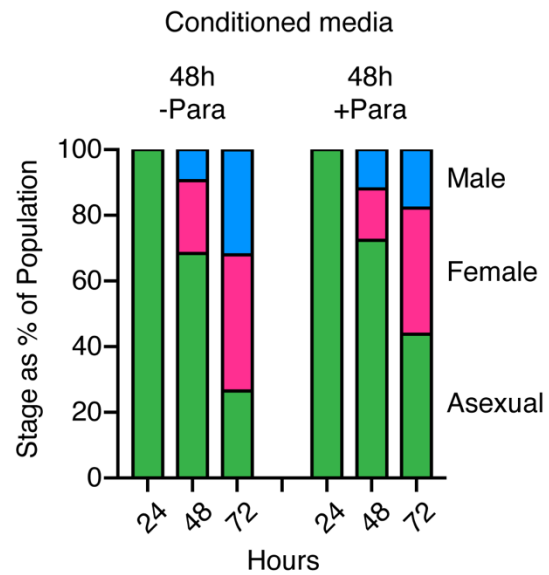

**E**

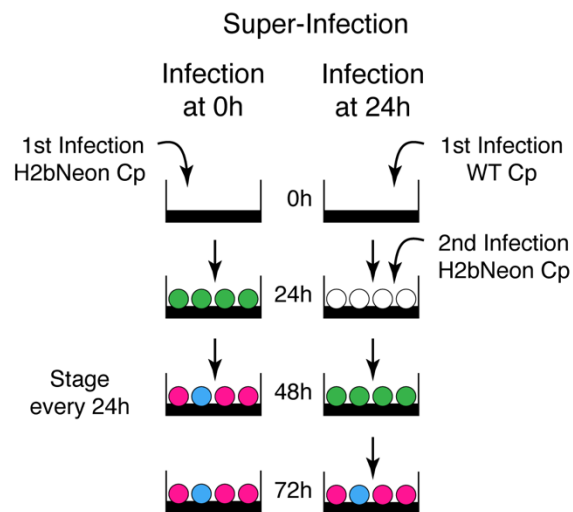

**F**

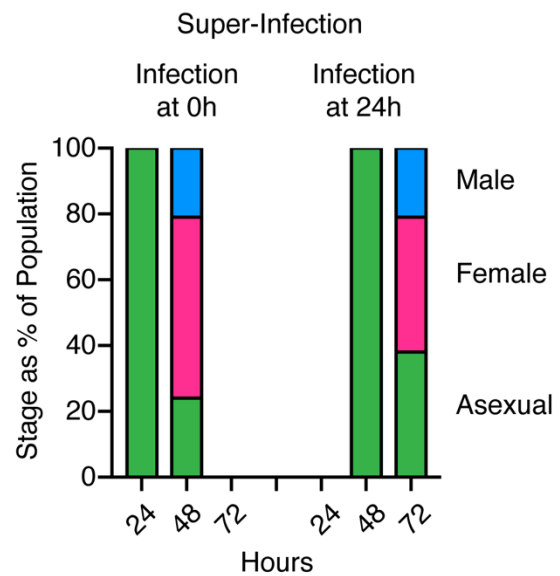

758 **Fig 1. Sexual differentiation of *C. parvum* is not dependent upon a secreted factor. (A)**  
759 Schematic representation of both the induction and program hypotheses of *C. parvum* sexual  
760 differentiation. **(B)** Schematic representation of the conditioned media experiment. Briefly, media  
761 was conditioned for 48 hours in the presence of HCT-8 host cells with or without *C. parvum*  
762 infection. Conditioned media was passed through a 0.45  $\mu$ m filter and then used for new infections  
763 that were scored for growth (C) and sexual differentiation (D). **(C)** Growth assay by luminescence  
764 for *C. parvum* growth in conditioned media. **(D)** Stage scoring of *C. parvum* at 24, 48 and 72 hours  
765 post infection when grown in conditioned media. **(E)** Schematic representation of super-infection  
766 experiment. Briefly, HCT-8 cells were infected with H2BmNeon parasites that were previously  
767 infected for 24 hours with wildtype parasites, or not previously infected. Both the primary infection  
768 (WT) and super infection (H2BmNeon) were scored for parasite life stage at indicated time points  
769 post infection. **(F)** Stage scoring and life cycle progression of *C. parvum* super-infection  
770 experiment.  
771

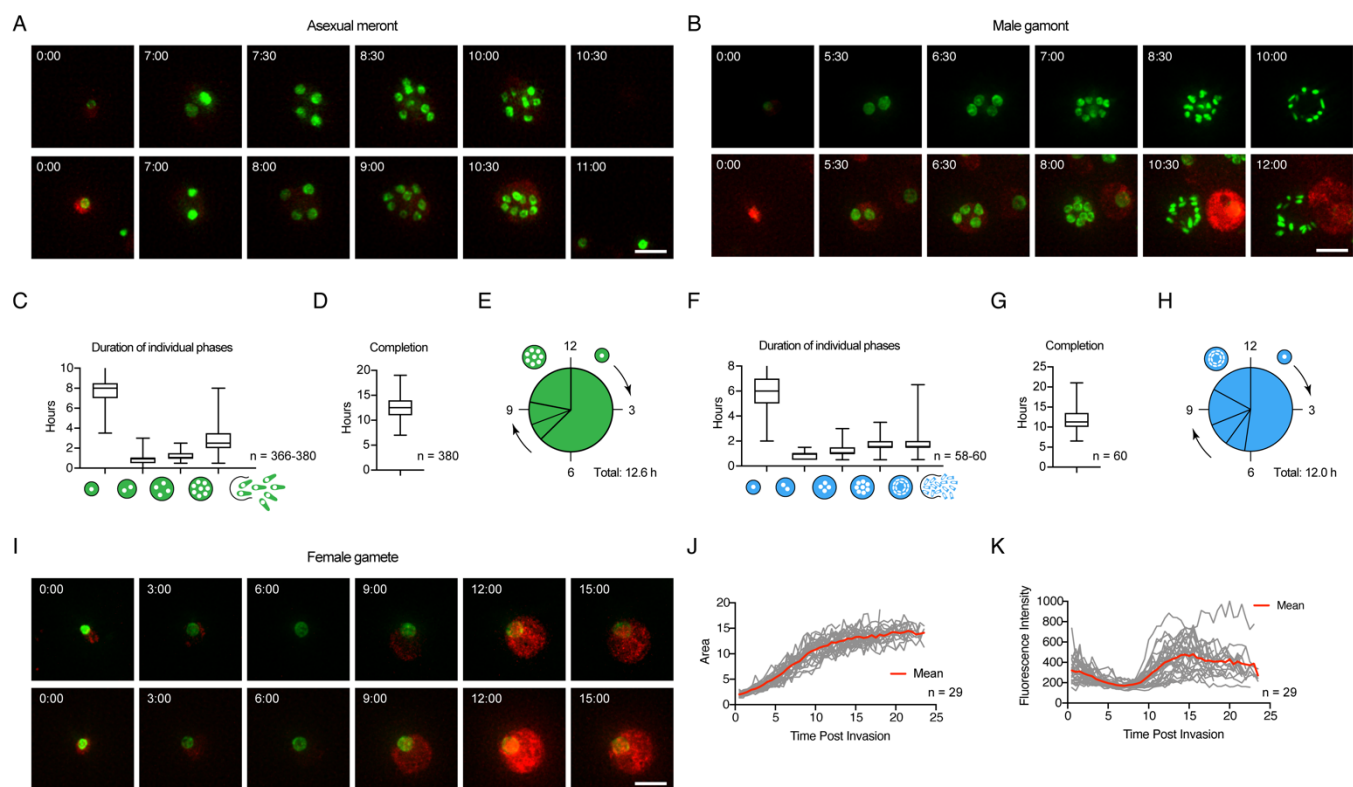

772

773 **Fig 2. The intracellular development of all stages can be observed in real time in living**  
 774 **cells. (A)** Images taken from time lapse microscopy depicting asexual growth and nuclear  
 775 division, two representative meronts. Scale bar 5  $\mu$ m. **(B)** Images taken from time lapse  
 776 microscopy depicting male parasite growth and nuclear division, two representative gamonts.  
 777 Scale bar 5  $\mu$ m. **(C)** Duration of phases of asexual growth. Parasites remain as a single nucleus  
 778 for an average of 7.92 hours, followed by 0.83 hours as 2 nuclei, 1.11 hours as 4 nuclei, and 2.77  
 779 hours as 8 nuclei prior to egress (n= 366-380). **(D)** Asexual parasites remain intracellular (invasion to egress)  
 780 to egress) for an average of 12.57 hours (n=380). **(E)** Graphical representation of the timing of  
 781 nuclear divisions during asexual development. **(F)** Duration of phases of male growth. Parasites  
 782 remain as a single nucleus for an average of 6.28 hours, followed by 0.92 hours as 2 nuclei, 1.07  
 783 hours as 4 nuclei, and 1.69 hours as 8 nuclei, and 2.05 hours as 16 nuclei prior to egress (n= 58-  
 784 60). **(G)** Male parasites remain intracellular (invasion to egress) for an average of 12.08 hours  
 785 (n=60). **(H)** Graphical representation of the timing of nuclear divisions during male development.



786 **(I)** Images taken from time lapse microscopy depicting female growth, two representative  
787 gametes. Scale bar 5  $\mu\text{m}$ . **(J)** Total area of female parasites over time. Grey lines represent  
788 individual female parasites, red line indicates the average area of female parasites over time  
789 (n=29). **(K)** Total fluorescent intensity of cytoplasmic mScarlet for the entire area of female  
790 parasites over time. Grey lines represent individual female parasites, red line indicates the  
791 average of female parasite over time (n=29).

792

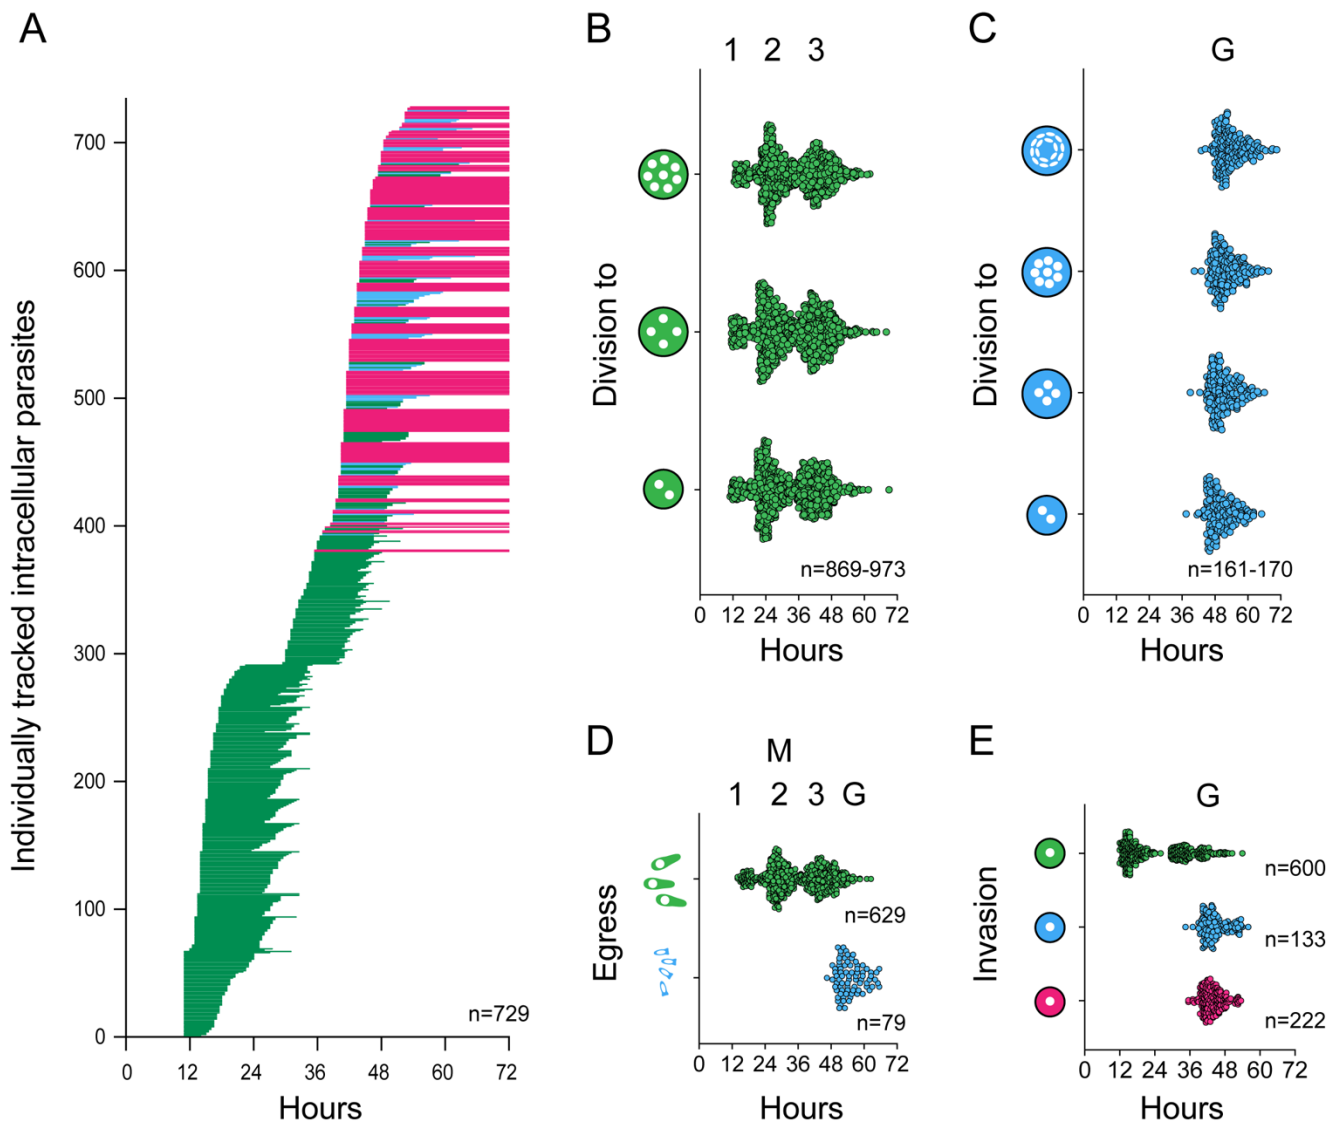

793

794 **Fig 3. Extended time-lapse imaging reveals three cycles of asexual schizogony followed**

795 **by differentiation into gametes. (A)** Individually tracked parasites over time. Each horizontal

796 line represents an individual parasite from invasion to egress (green= asexual, blue= male, pink=

797 female). Lines for females cut off at 72 hours, as we do not observe egress of these parasites.

798 Parasites with observed egress, but which invaded prior to the start of the experiment are included

799 with lines beginning at 11 hours (n=729). **(B)** Individually plotted nuclear division events for

800 asexual parasites over time. The time point at which we observe 2, 4, or 8 nuclei for the first time

801 for parasites designated as asexual are plotted as individual points over time (n=869-973). **(C)**

802 Individually plotted nuclear division events for male parasites over time. The time point at which  
803 we observe 2, 4, 8, or 16 nuclei for the first time for parasites designated as male are plotted as  
804 individual points over time (n=161-179). **(D)** Individually plotted egress events for both asexual  
805 (green) and male (blue) parasites over time. The time at which we no longer observe a parasite  
806 is designated the time of egress. Each point represents a single asexual meront or male gamont.  
807 There are 3 distinct clusters of asexual egress events, and a single cluster of male egress events  
808 (asexual n=629, male n=79). **(E)** Individually plotted invasion events for asexual (green), male  
809 (blue), and female (pink) parasites over time. The time at which a parasite is first observed is  
810 considered the time of invasion. There are two observed clusters of invasion events leading to  
811 asexual parasites, and only one cluster leading to male or female cells, respectively (asexual  
812 n=600, male n=133, female n=222).

813

A

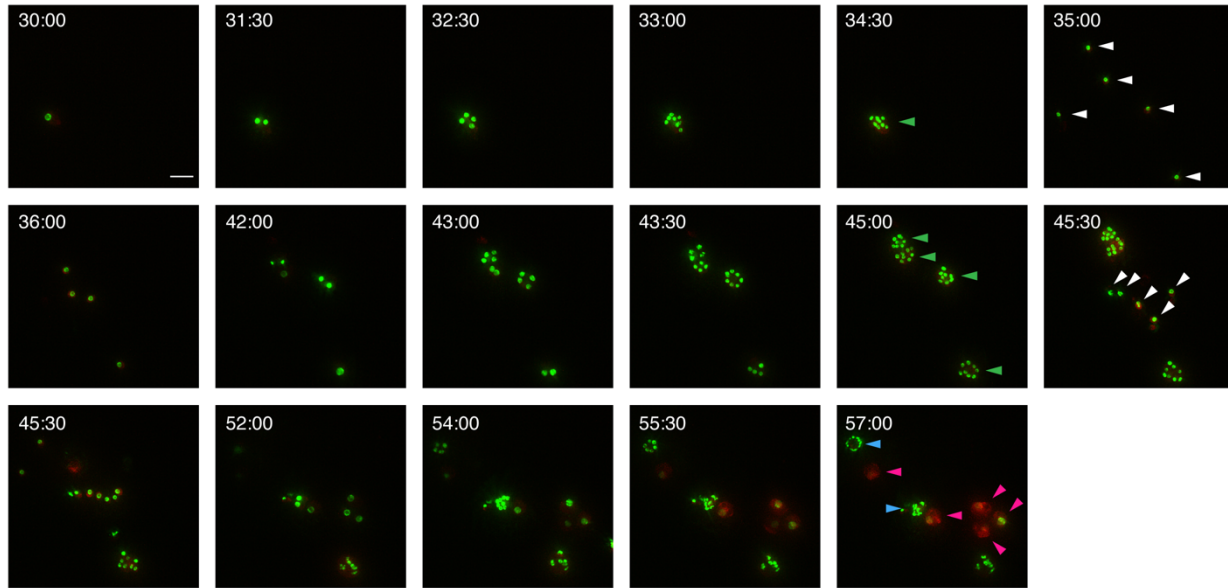

B

Fate mapping of parasite development

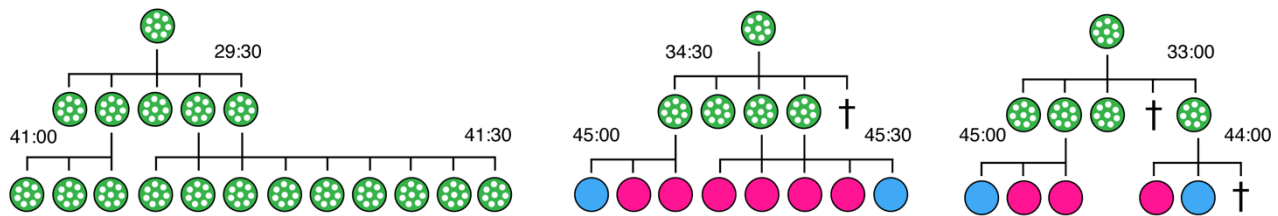

C

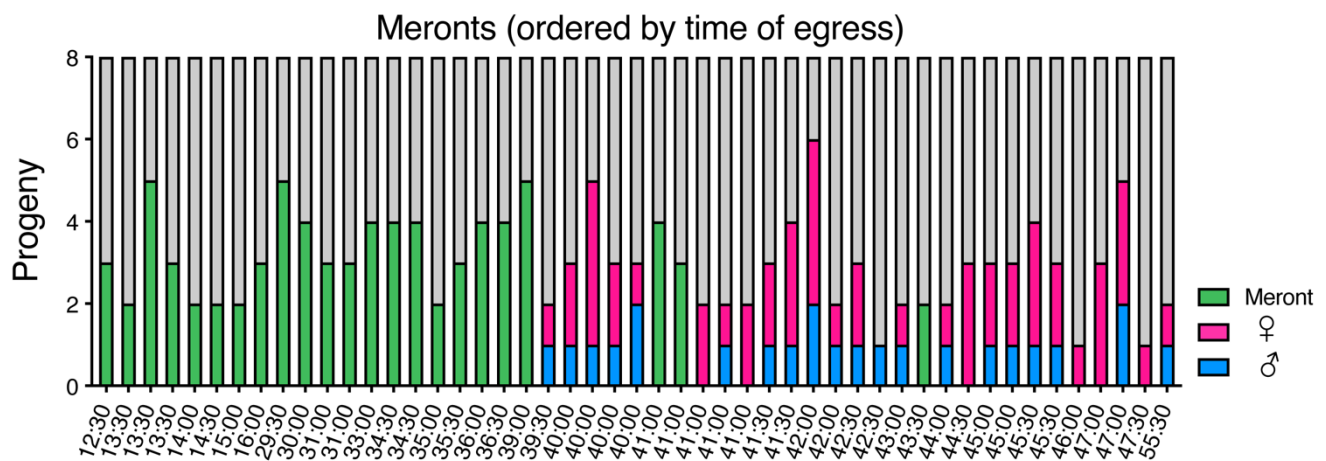

814

815 **Fig 4. Meronts commit their merozoites to either asexual or sexual fate, but when**  
 816 **committed to sex give rise to both males and females. (A) Images taken from time lapse**

817 microscopy depicting multiple generations of parasite replication, including both asexual and  
818 sexual stage growth and development. Stills take from video (see S4 Movie) over 27 hours of  
819 observation. Green arrows indicate final fate of asexual meronts, white arrows indicate newly  
820 invaded parasites immediately following an egress event. Blue arrows indicate parasites  
821 designated with a male fate, pink arrows indicate parasites designated with a female fate. Scale  
822 bar 5  $\mu\text{m}$ . **(B)** Representative trees depicting the mapped fate of parasites for which the fate of  
823 progeny of a single parental meront could be tracked. The tree in the center represents the images  
824 seen in (A). **(C)** Fate of progeny of single meronts, ordered by time of egress. For each parental  
825 meront, the fate of all observable progeny was tracked and is indicated (asexual=green,  
826 male=blue, female=pink). Individual parental meronts are ordered by the time at which the  
827 parental meront was last observed.

828

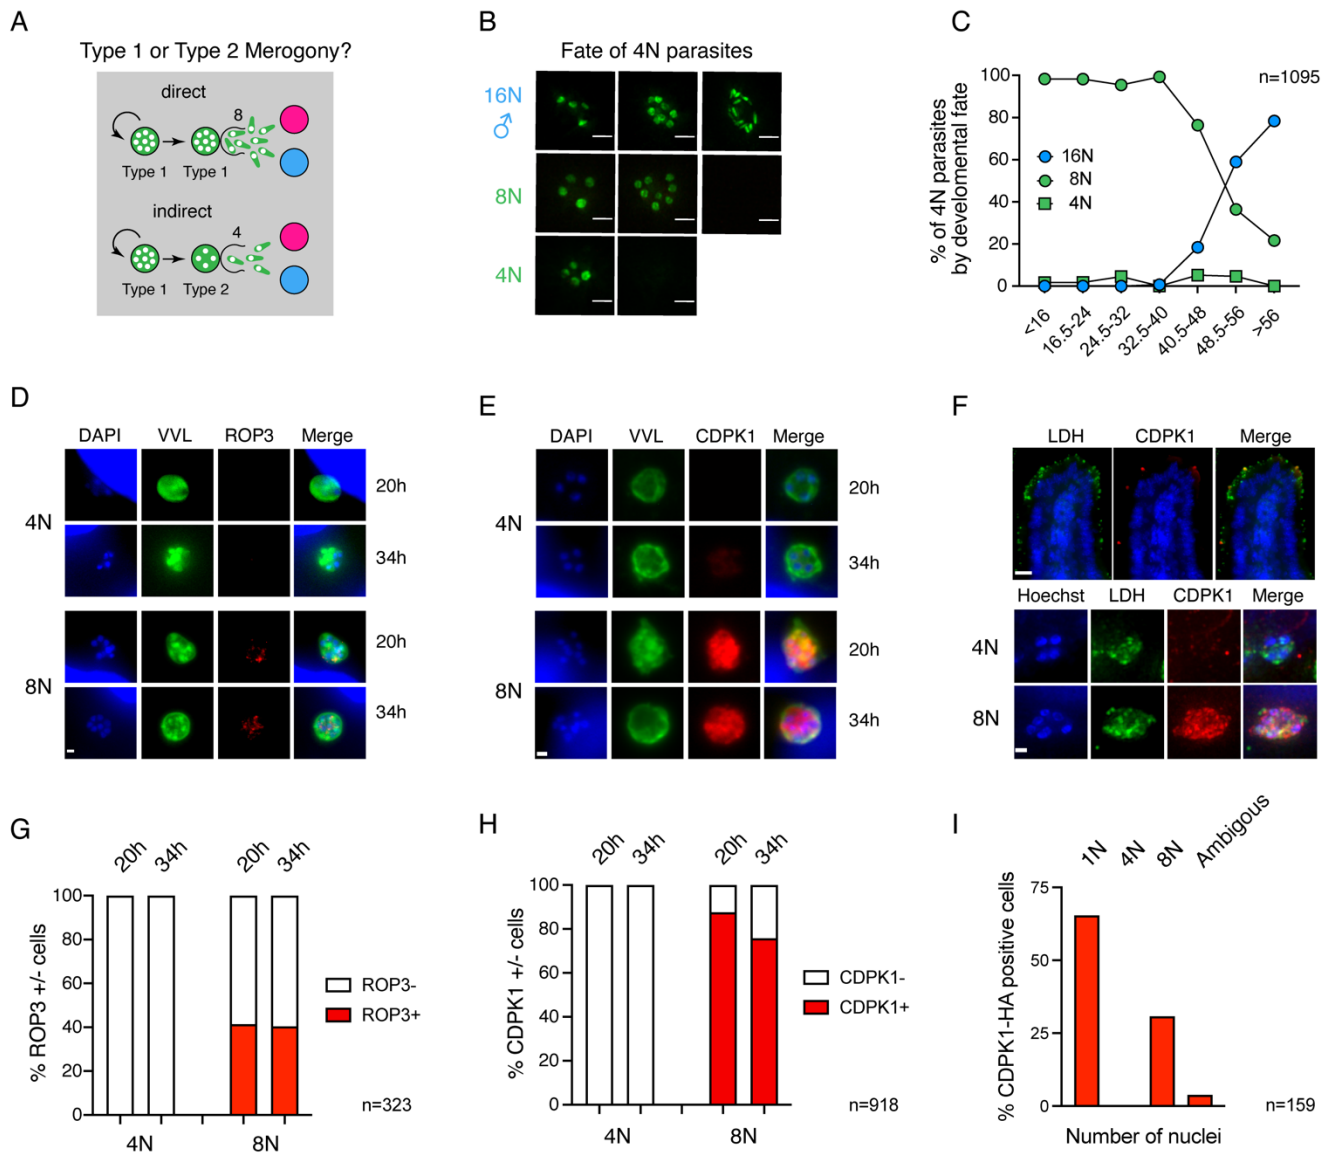

829

830 **Fig 5. Development to gametes occurs directly from type one meronts and there is no**  
 831 **evidence to support a 4N type two meront as the committed stage. (A)** Schematic depicting  
 832 hypotheses of life cycle progression. Parasites might undergo direct development in which Type  
 833 I meronts producing 8 progeny develop into sexual stages or indirect development in which an  
 834 intermediary Type II meront producing only 4 progeny gives rise to sexual stages. **(B)** Images  
 835 depicting the possible fates of parasites that progress through a stage with 4 nuclei. Parasites  
 836 were assigned 3 fates: 1) Those that progress from 4, to 8, and eventually 16 nuclei are male 2)  
 837 Those that progress from 4 to 8 nuclei are asexual Type I meronts, and 3) Those that appear to

838 egress as 4 nuclei are asexual Type II meronts. Parasites which remained as 4 nuclei until the  
839 end of the experiment were excluded from this analysis. **(C)** Graph of the fate of 4N parasites over  
840 time. Prior to 16 hours of infection nearly 100% of the parasites that pass through a 4N stage  
841 become 8N prior to egress. This decrease after 40.5 hours of infection, and this decrease is  
842 proportional to the increase in parasites that become 16N (male) at these time points (n=1095).  
843 **(D and E)** Immunofluorescence of HCT-8 cells infected with transgenic *C. parvum* expressing  
844 ROP3-HA or CDPK1-HA, respectively. Representative images of 4N or 8N meronts at 20 and 34  
845 hours post infection are shown. Only parasites with 8 nuclei express ROP3 (D) or CDPK1 (E) at  
846 either time point. Scale bar 1  $\mu$ m. **(F)**  $lfn\gamma^{-/-}$  mice were infected with CDPK1-HA parasites and  
847 immunofluorescence staining was conducted on frozen sections of the small intestine. Top, low  
848 magnification micrograph of a highly infected segment of the intestinal tissue. Scale bar 15  $\mu$ m.  
849 All parasite stages are labelled with an antibody to LDH (green) and mature meronts ready to  
850 egress are labeled with CDPK1 (red). Bottom, higher magnification images of 4N or 8N parasite.  
851 Parasites with 8 nuclei but not 4 nuclei express CDPK1 *in vivo*. Scale bar 1  $\mu$ m. **(G)** Quantification  
852 of the ROP3 positive meronts for the entire 4N or 8N population at 20 and 34 hours post infection.  
853 **(H)** Quantification of the CDPK1 positive meronts at 20 and 34 hours post infection. **(I)**  
854 Quantification of the number of nuclei of a total of 159 CDPK1 positive parasites observed in 26  
855 independent fields of view of intestinal sections. Only young 1N trophozoite and meronts 8 nuclei  
856 were positive for CDPK1 and matching our studies in culture we did not observe a single positive  
857 tetraploid parasite.

858

859

A

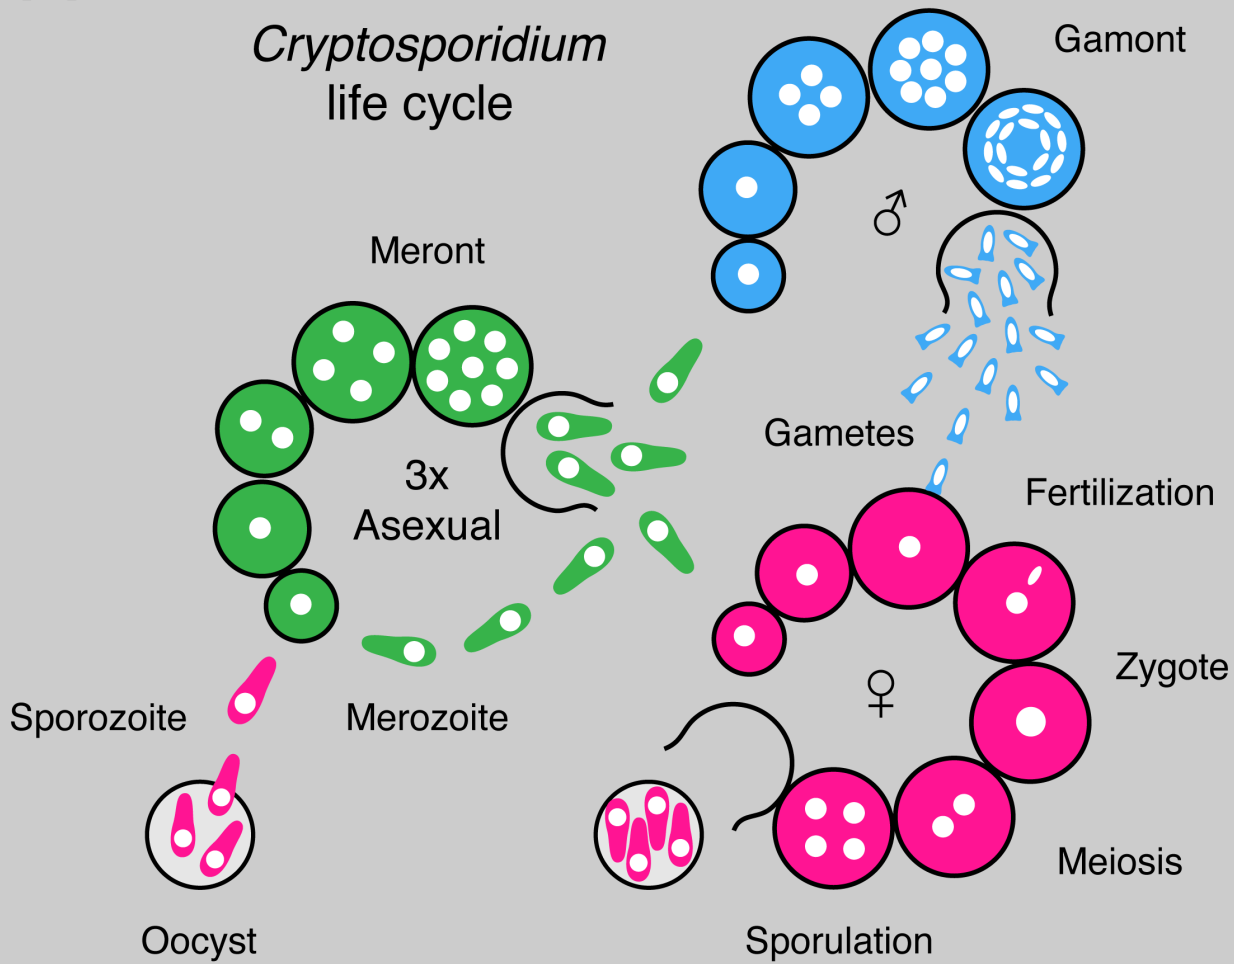

B

Meront commitment hypothesis

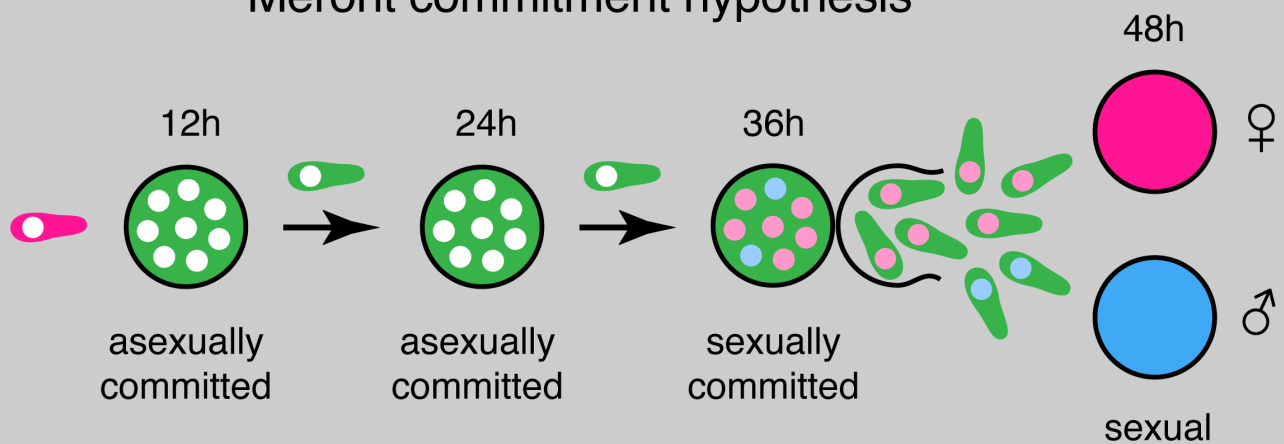



861           **Fig 6. Model of *Cryptosporidium* life cycle and sexual commitment. (A)** Schematic  
862 representation of the life cycle for *Cryptosporidium* summarizing the findings of this study.  
863 Infection begins with the oocyst which releases four sporozoites that invade intestinal epithelial  
864 cells. The parasites replicate asexually (green) by synchronous schizogony for three cycles and  
865 invariably produce eight merozoites. Merozoites emerging from the third round upon reinvasion  
866 give rise to sexual stages, both males (blue) and female (pink). The male gamont undergoes four  
867 rounds of synchronous nuclear division producing 16 gametes, while the female gamete is cell  
868 cycle arrested and remains haploid while expanding in size and stockpiling proteins, lipids, and  
869 carbohydrates for the future oocyst. Male gametes egress and fertilize intracellular female  
870 gametes. Following fertilization, meiosis, and sporulation oocyst are released from the host cell  
871 that are immediately infectious. Oocyst can be shed with the feces resulting in transmission or  
872 excyst and reinfect the same host. **(B)** We propose a developmental commitment model of  
873 lifecycle progression for *Cryptosporidium*. Merozoites emerging a merogony cycle are collectively  
874 committed to an asexual or sexual fate, and when sexually committed give rise to both male and  
875 females (commitment is represented symbolically here by coloring the nuclei forestalling future  
876 fate, however, we note that the mechanism is unknown and may be independent of the nucleus).  
877

## 878 Supporting information

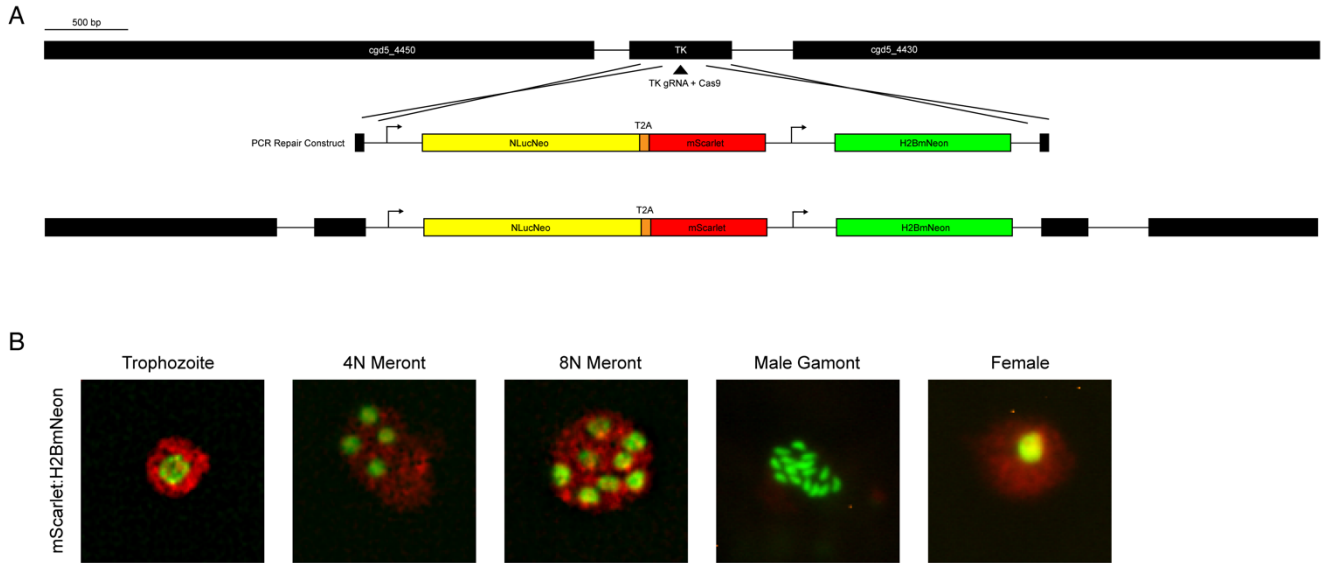

879

880 **S1 Fig. Generation of mScarlet-H2BmNeon parasites.** (A) Schematic overview of the guide  
881 and repair constructs used to generate the transgenic parasite line with a cytosolic mScarlet and  
882 a nuclear mNeon inserted into the TK locus. (B) Visualization of the fluorescent protein localization  
883 in multiple life stages for the mScarlet-H2BmNeon transgenic parasites.

884

885

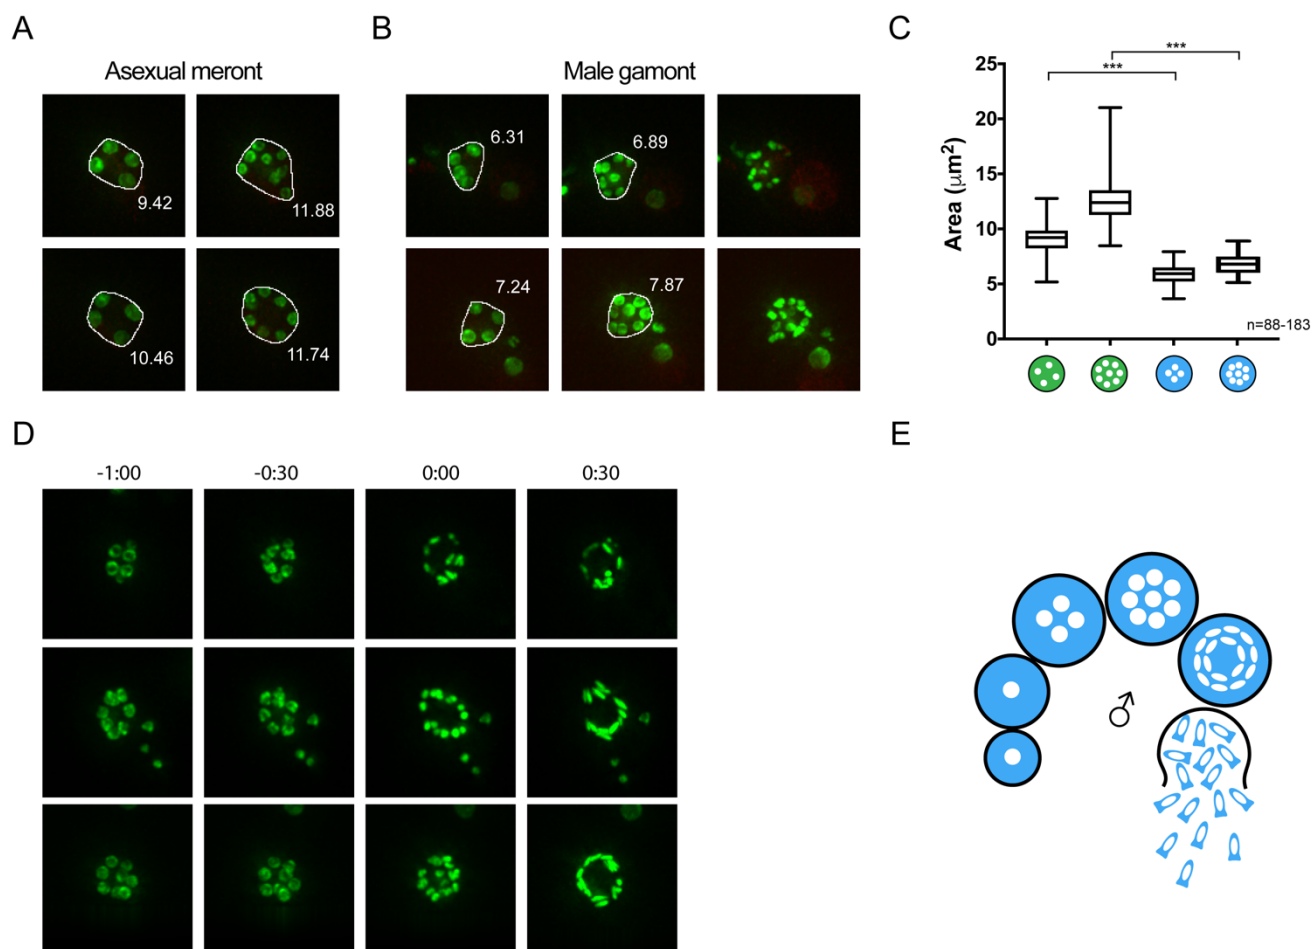

886

887 **S2 Fig. The nuclei of dividing male parasites cluster closer together than those of dividing**  
888 **asexual parasites. (A)** Two representative images depicting asexual parasites at 4 and 8 nuclei,  
889 including the boundary drawn around all nuclei to measure nuclear spread. The area for each  
890 meront is included. **(B)** Representative images depicting male parasites at 4, 8 and then 16 nuclei,  
891 including the boundary drawn around all nuclei at 4 and 8 nuclei stages to measure nuclear  
892 spread. The area for each gamont is included. **(C)** Comparison of the area of nuclear spread for  
893 asexual and male parasites with 4 or 8 nuclei. The area taken up by male nuclei is significantly  
894 smaller than the area taken up by asexual nuclei at both the 4 and 8 nuclei stages (Welch's T-  
895 test, \*\*\*  $p < 0.0001$ ). **(D)** Three representative image series of male nuclear development. Nuclei

896 remain round when 8 nuclei are present and adopt distinct bullet-like male shape only after  
897 dividing to 16 nuclei.

898

899

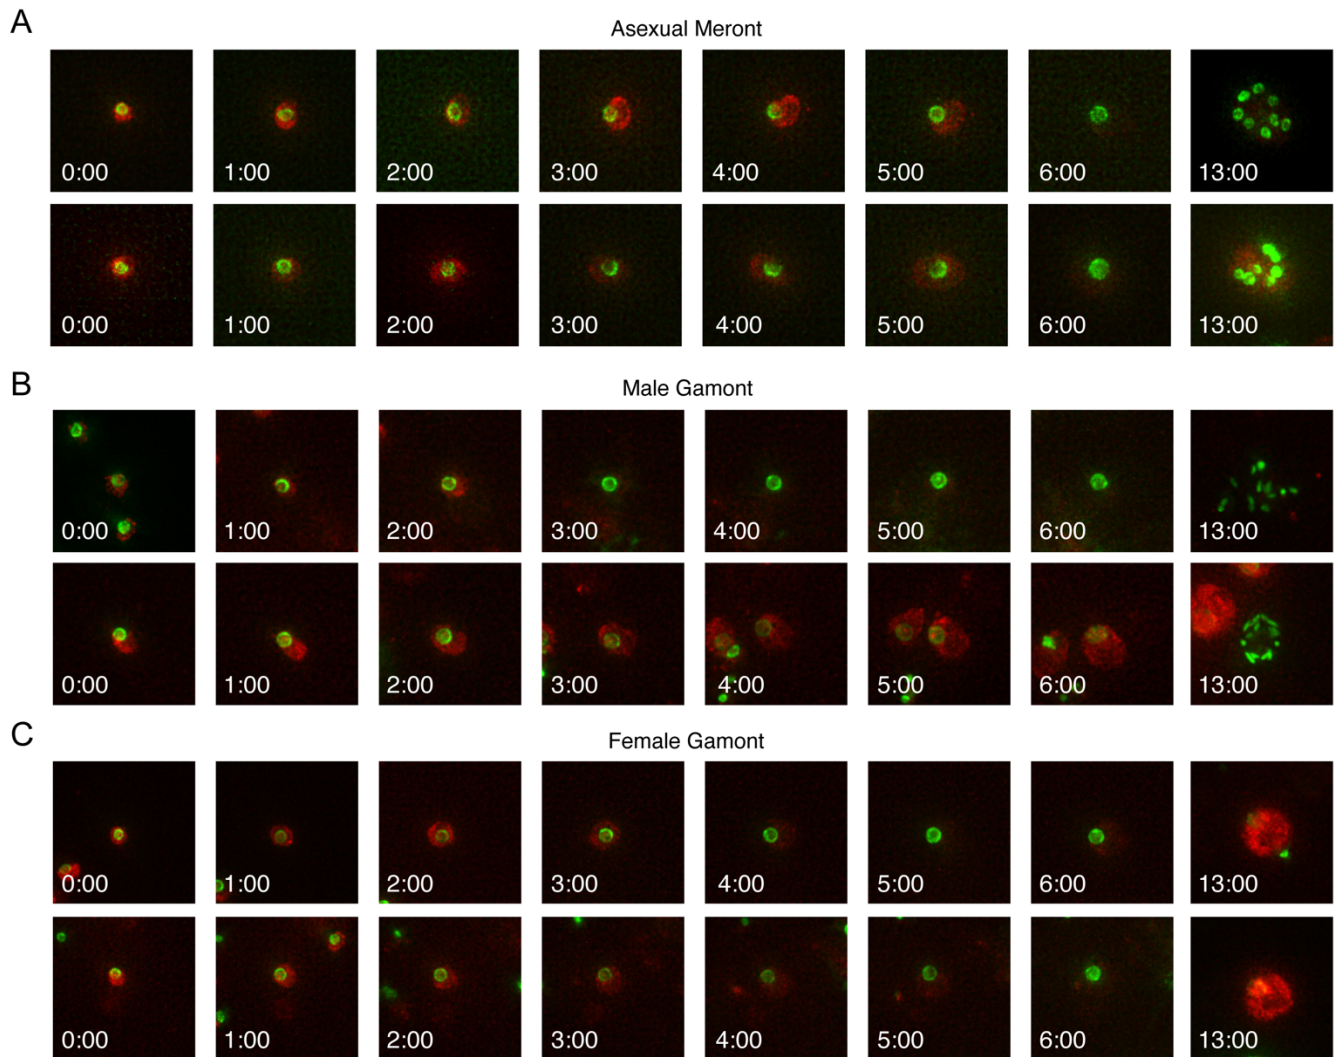

900

901 **S3 Fig. The establishment phase of asexual, male, and female parasites is visually**  
902 **indistinguishable for the first 6 hours of infection. (A)** Images from two representative asexual  
903 meronts shown every hour for the first six hours, followed by a 13 hours time point to confirm  
904 stage. **(B)** Images from two representative male gamonts shown every hour for the first six hours,  
905 followed by a 13 hours time point to confirm stage. **(C)** Images from two representative female  
906 gamonts shown every hour for the first six hours, followed by a 13 hours time point to confirm  
907 stage.

908

909 **S1 Movie. Growth and division of asexual *C. parvum*.** Five representative videos of individual  
910 asexual meronts from first appearance to apparent egress.

911

912 **S2 Movie. Growth and division of male *C. parvum*.** Five representative videos of individual  
913 male gamonts from first appearance to apparent egress.

914

915 **S3 Movie. Growth and development of female *C. parvum*.** Five representative videos of  
916 individual female gamonts from first appearance until maximum fluorescence intensity has  
917 passed.

918

919 **S4 Movie. Multiple generations of asexual growth and sexual development of *C. parvum*.** A  
920 representative image of two generations of asexual growth, followed by the development of male  
921 and female gamonts.

922

923
